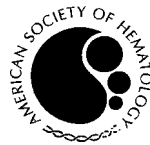

# Chronic Myeloid Leukemia

*Junia V. Melo, Timothy P. Hughes, and Jane F. Apperley*

Chronic myeloid leukemia (CML) was the first human malignancy to be associated with a specific genetic lesion, the Philadelphia chromosome, harboring the *BCR-ABL* oncogene. Since then, it has become a paradigm for the discovery of molecular mechanisms and targeted therapeutic approaches in the field of hematologic neoplasias. The past 5 years or so have been particularly fruitful in the dissection of the signal transduction pathways abnormally activated in CML and in the translation of this knowledge to clinical practice. In this report, we discuss the biological basis for such translation and highlight the current and potential tools for the effective treatment of CML patients. The first part presents a review of the basic concepts on the biology of CML and their application to the design of targeted therapy. The mechanisms of action of the molecular-specific drugs currently used in clinical trials are discussed, with emphasis on the description of the

most promising new compounds that are enhancing the potential for effective alternative or combination chemotherapy in CML. In the following section, we explain how molecular monitoring of response to imatinib mesylate in patients with CML can be used as a guide to clinical management. In particular, we discuss the relative value of regular quantitative RT/PCR and cytogenetic analyses, how responding patients should be monitored and managed, and how to investigate patients who are refractory or become resistant to imatinib treatment. In the last part of this report, a discussion on the possibility of managing CML with patient-specific strategies is presented. We review the current treatment options, highlight the factors impacting on decision making, discuss the range of possibilities for future therapeutic strategies and propose a systematic approach for individualizing treatment for patients in different disease categories.

## I. THE BIOLOGY OF CML AND TARGETS FOR MOLECULAR THERAPY

*Junia V. Melo, MD, PhD\**

Chronic myeloid leukemia (CML) is a hematopoietic disorder characterized by the malignant expansion of bone marrow stem cells. Its cytogenetic hallmark is a reciprocal t(9;22)(q34;q11) chromosomal translocation that creates a derivative 9q<sup>+</sup> and a small 22q<sup>-</sup>, known as the Philadelphia (Ph) chromosome.<sup>1</sup> The latter harbors the *BCR-ABL* fusion gene encoding a chimeric Bcr-Abl protein with a deregulated tyrosine kinase activity (**Figure 1**; see Appendix, page 598), the expression of which has been shown to be necessary and sufficient for the transformed phenotype of CML cells. CML is unusual among human cancers in that a single oncogene

product has been identified as having a central role in its pathology.

Through the contribution of various researchers, the past 20 years have brought us considerable knowledge on the molecular and cell biology of CML, creating the essential platform for targeted therapy to be engineered (**Figure 2**; see Appendix, page 599). It soon became clear that the Bcr-Abl oncoprotein itself is the best molecular target presented by CML cells because it is not expressed by normal cells. Furthermore, the dissection of the signal transduction pathways affected by the deregulated kinase activity of Bcr-Abl provided information on additional or alternative signaling steps that could be interrupted in an attempt to eliminate the oncogenic effect of Bcr-Abl. More recently, attention has also been focused on immunological means of recognizing and destroying the leukemic clone, and these approaches look promising, particularly in the context of eliminating residual disease after various sorts of “debulking” therapy.

\* Department of Haematology, Imperial College, Hammer-smith Hospital, Du Cane Road, London W12 0NN, UK

## Molecular Targeting of the *BCR-ABL* Gene Products

Although initial efforts in the early 1990s were directed toward attempts to inhibit BCR-ABL gene function via its RNA message, this strategy was never successfully translated into efficient forms of treatment for CML. Thus, the elucidation of the structure and mechanisms of action of the end product of the chromosomal translocation, the Bcr-Abl protein itself, shifted the focus to the investigation of small molecules that could interact with and inhibit this oncoprotein.

### Bcr-Abl Oncoprotein

In CML, the mRNA molecules transcribed from the hybrid gene usually contain 1 of 2 *BCR-ABL* junctions, designated e13a2 (formerly b2a2) and e14a2 (b3a2), respectively. Both mRNAs are translated into an oncoprotein of 210 kDa molecular weight. The leukemogenic potential of the p210<sup>Bcr-Abl</sup> resides in the fact that the normally regulated tyrosine kinase activity of the Abl protein is constitutively activated by the juxtaposition of “alien” Bcr sequences (**Figure 1**; see Appendix, page 598). Bcr acts by promoting dimerization of the oncoprotein such that the 2 adjacent Bcr-Abl molecules phosphorylate their respective partners on tyrosine residues in their kinase activation loops.<sup>2</sup> The uncontrolled kinase activity of Bcr-Abl then usurps the physiological functions of the normal Abl enzyme by interacting with a variety of effector proteins, the net result of which is deregulated cellular proliferation, decreased adherence of leukemia cells to the bone marrow stroma and reduced apoptotic response to mutagenic stimuli (**Figure 1**; see Appendix, page 598). The relative contributions of these effects to the phenotype of chronic phase CML is still poorly understood.<sup>3</sup>

The Bcr-Abl protein structure and the biochemical pathways in which it is involved have been extensively investigated and recently reviewed by us.<sup>4</sup> Knowledge of the function of several structural domains ‘inherited’ from the parental Bcr and Abl proteins allows one to test for certain properties of the fusion product. Thus, the tyrosine kinase encoded by the Src-homology 1 (SH1) domain of the Abl component of Bcr-Abl is undoubtedly the most crucial for oncogenic transformation. Other important motifs in the Abl portion are the protein-interaction SH2 and the C-terminal nuclear localization signal (NLS), DNA- and actin-binding domains. On the Bcr moiety, the coiled-coil motif encoded by the first *BCR* exon is responsible for dimerization of the oncoprotein; a tyrosine at position 177 is crucial for the binding of adaptor proteins such as Grb-2; and amino terminal phosphoserine/phosphothreonine residues are required for interaction with SH2-containing

proteins, including Abl itself (**Figure 1**; see Appendix, page 598).

### Inhibiting the Tyrosine Kinase Activity of Bcr-Abl

Due to its essential role in the leukemogenicity of the oncoprotein, the SH1 domain of Bcr-Abl is an obvious molecular target. Early screenings of natural products for compounds capable of antagonizing this catalytic activity identified an isoflavonoid, genistein, and an antibiotic, herbimycin-A, as potential candidates. Subsequent efforts have focused on the rational design of synthetic compounds with chemical structures that are able to compete with either adenosine triphosphate (ATP) or a substrate for occupancy of the binding site in the kinase domain.

The most successful synthetic ATP-binding inhibitor that has been developed to date is the 2-phenylaminopyrimidine, imatinib mesylate, formerly known as STI571 (Glivec<sup>®</sup> or Gleevec<sup>™</sup>, from Novartis Pharma, Basel, Switzerland). Initial preclinical studies showed that imatinib was effective at inhibiting the autophosphorylation of Abl, the platelet-derived growth factor receptor (PDGFR), the Kit receptor<sup>5</sup> and the Arg (*ABL*-related gene) tyrosine kinases at submicromolar concentrations.<sup>6</sup> The most striking feature of the compound is its remarkable degree of specificity, its effect on other tyrosine kinases being negligible. The proliferation of CML progenitor cells was inhibited by treatment with the inhibitor but control normal cells were largely unaffected.<sup>7,8</sup> Selective inhibition of growth could also be demonstrated for *BCR-ABL*<sup>+</sup> cell lines both in vitro<sup>8</sup> and in mice.<sup>7,9</sup>

The combined preclinical data suggested that imatinib might have value as a therapeutic agent, and the first clinical trials with this drug were initiated in 1998. Presently, over 60,000 patients have been treated worldwide with imatinib, and the success forecasted from those initial data has been largely achieved (see below on the clinical sections of this article). However, there remain problems associated with the clinical use of imatinib for the treatment of CML. In advanced phase disease, the responses are often short-lived and patients invariably undergo disease progression following the brief periods of respite. This results from the emergence of a leukemic clone resistant to the drug following its regular administration. The mechanisms of resistance to imatinib are still not completely known, but include the selection of cells that overexpress Bcr-Abl,<sup>10-12</sup> cells that express normal levels of Bcr-Abl but with mutations in the Abl kinase domain,<sup>13-16</sup> and cells that seem to be independent of Bcr-Abl expression, perhaps via abnormal activation of other oncogenic pathways.<sup>17-19</sup> Conceivably, more than 1 of these mechanisms may

coexist in the same cell. Cells resistant via any of these mechanisms may be specifically selected by imatinib regardless of the fact that in Bcr-Abl-independent cells, the drug appears to be effective in inhibiting Bcr-Abl signaling.<sup>10,18</sup> It has been argued that resistance to imatinib might be expected to develop more rapidly and more uniformly than resistance to conventional cytotoxic drugs precisely because imatinib has such a highly specific target profile.<sup>20,21</sup>

A mutant amino acid in the Abl kinase domain leads to drug resistance if it directly or indirectly obstructs the appropriate binding of imatinib to the kinase pocket, without, however, preventing the kinase from accepting ATP and thus phosphorylating the substrates that generate the CML phenotype. In these instances, it might be possible to design new analogues of imatinib. Ideally, these agents would inhibit the modified kinase configuration, and yet retain the same degree of specificity and lack of effect in normal cells. Such an agent would be a welcome addition to imatinib in the drug armamentarium for treating CML. This would allow one to combine analogues, individualizing therapy on the basis of molecular surveillance of the *BCR-ABL* sequences present in the tumor load. Such an approach is technically feasible and would likely represent an improvement on imatinib monotherapy. Certainly, other small-molecule inhibitors of the Bcr-Abl kinase are in development, and appear to partake in slightly different molecular interactions.<sup>22</sup>

The best example of alternative ATP competitors potentially useful for the treatment of CML is a family of pyridol[2-3-d]pyrimidine compounds originally described as potent Src inhibitors.<sup>23</sup> Among 7 of these compounds tested recently by the Memorial Sloan-Kettering group, 2 in particular, PD173955 and PD166326, were shown to be strong suppressors of the growth of *BCR-ABL*-positive cells via their effects on Bcr-Abl.<sup>24</sup> Furthermore, these pyridol-pyrimidine kinase inhibitors appear to be effective, at nanomolar concentrations, in suppressing the proliferation of some types of imatinib-resistant *BCR-ABL*-positive cells<sup>25</sup> (and Tipping et al, in preparation).

In the presence of an ATP-competitor such as imatinib, the SH1 domain of Bcr-Abl retains its ability to associate with substrate molecules but is unable to catalyze their phosphorylation. An alternative approach for inhibiting the tyrosine kinase activity of the oncoprotein is the use of chemical agents that inhibit or modify the binding of substrates. Under these conditions, the ATP-binding pocket of the SH1 domain is unaffected but association of the kinase with its substrates is impaired. A class of synthetic compounds generically called tyrphostins inhibits the tyrosine ki-

nase activity of Bcr-Abl in this fashion, resulting in the loss of kinase autophosphorylation, and the subsequent degradation of Bcr-Abl. Adaphostin (NSC 680410), the adamantyl ester of the tyrphostin AG957, has a longer serum half-life than AG957 and greater in vitro potency. The compound has been reported to induce apoptosis in a dose- and time-dependent manner via the mitochondrial pathway, and continues to exert its effects following withdrawal.<sup>26</sup> Interestingly, adaphostin appears to induce cell death without downregulating the antiapoptotic proteins (such as XIAP and Bcl-X<sub>L</sub>) that are thought to contribute a survival advantage to CML cells. In a recent study,<sup>26</sup> the effects of adaphostin were compared with those of imatinib mesylate on K562 cells, *BCR-ABL*-transduced FDC-P1 cells and primary hematopoietic progenitors from CML patients. In K562, levels of p210<sup>Bcr-Abl</sup> were reduced following a 6-hour exposure to 10 mM adaphostin. Caspase activation occurred by 12 hours, and by 24 hours 90% of the K562 cells were apoptotic. In contrast, treatment of K562 with 20 mM imatinib led to rapid inhibition of Bcr-Abl autophosphorylation without degradation of the p210 protein. Adaphostin was selectively toxic for leukemic cells, inhibiting CML granulocyte colony-forming units (CFU-G) but not normal CFU-G. Importantly, imatinib-resistant K562 cells proved to be sensitive to adaphostin. This last finding is consistent with the notion that imatinib and adaphostin exert their inhibitory effects on the tyrosine kinase activity of Bcr-Abl by separate and distinct mechanisms. Treatment of K562 cells with both imatinib and adaphostin induced greater cytotoxicity than that achieved with either agent alone. Hence, adaphostin may prove to be a valuable compound for use in combination with imatinib mesylate.

### Blocking Oligomerization of Bcr-Abl

The oligomerization domain of Bcr-Abl represents an attractive target for molecular therapy because several lines of evidence suggest that this domain is also essential for the transforming activity of the oncoprotein. The correlation between oligomerization and transformation has been interpreted as evidence that Bcr-Abl must undergo tetramerization in order to become activated. Thus, the formation of Bcr-Abl homotetramers would promote their intermolecular cross-phosphorylation and activation in a manner analogous to the dimerization, cross-phosphorylation and activation of growth factor receptor tyrosine kinases.<sup>2</sup> According to this model, monomers of Bcr-Abl are non-transforming whereas the oncogenic, transforming species are Bcr-Abl tetramers. In agreement with this hypothesis is the finding that expression of a peptide consisting of the first 160 amino acid residues of Bcr, including the oli-

gomerization domain, was able to restore growth factor dependence to a growth factor-independent, *BCR-ABL*<sup>+</sup>, murine hematopoietic cell line.<sup>27</sup> Furthermore, by cotransfecting the cells with vectors encoding the *BCR* fragment and the full-length *BCR-ABL* in different stoichiometric ratios, growth factor-independent colony formation, characteristic of the transformed phenotype, could be inhibited in a dose-dependent manner. The Bcr fragment was presumed to disrupt the formation of transforming Bcr-Abl homotetramers by oligomerizing with Bcr-Abl monomers.

Although none of the currently available therapies for CML target the oligomerization domain of Bcr-Abl, this approach could be exploited for therapeutic gain. In a recent study in which mice were injected with bone marrow cells that had been retrovirally transduced with mutant *BCR-ABL* constructs, those animals receiving cells expressing the full-length Bcr-Abl oncoprotein developed a myeloproliferative disorder resembling human CML, whereas mice receiving cells expressing a mutant Bcr-Abl protein lacking the first 63 amino acids failed to develop this disease.<sup>28</sup> A case could be made for the development of synthetic molecules capable of inhibiting or disrupting Bcr-Abl oligomerization. Although such inhibitors might be expected also to inhibit the oligomerization of wild-type Bcr, there is evidence that disruption of the normal functioning of this protein need not necessarily be deleterious to health.<sup>29</sup>

### Destabilizing the Bcr-Abl Protein

In most cases of molecular therapies that target particular domains of Bcr-Abl in order to inhibit its function, the Bcr-Abl oncoprotein, despite being functionally inhibited, continues to be expressed by the leukemic cells. The persistence of Bcr-Abl presents particular problems for treatment with imatinib where the selection of clones with mutated amino acids or overexpression of the oncoprotein leads to the emergence of resistance. Hence, the development of therapies that aim at inhibiting expression of Bcr-Abl is particularly desirable. The stability of Bcr-Abl is dependent upon it forming a multiprotein complex with the heat shock protein (HSP) Hsp90 and a cochaperone protein, p23. Brief exposure to geldanamycin, a specific inhibitor of Hsp90, causes Bcr-Abl to dissociate from Hsp90 and p23 and to form another complex with the chaperone proteins, Hsp70 and p60<sup>Hop</sup>.<sup>30</sup> The p210<sup>Bcr-Abl</sup>-Hsp70-p60<sup>Hop</sup> complex is less stable than the p210<sup>Bcr-Abl</sup>-Hsp90-p23 complex since increased proteasome degradation of Bcr-Abl occurs following treatment with geldanamycin.<sup>31</sup> A recent report<sup>32</sup> suggests that these drugs may be of particular benefit to patients who have relapsed following treatment with imatinib mesylate. Both

geldanamycin and its less toxic analogue 17-allylamino-17-demethoxygeldanamycin (17-AAG) induced the degradation of wild-type p210<sup>Bcr-Abl</sup> and two mutant Bcr-Abl proteins (T315I and E255K) found in imatinib-resistant patients. Moreover, both compounds exhibited greater potency against the mutant forms than against the wild-type Bcr-Abl. Similar effects have been observed in cells rendered resistant to imatinib via Bcr-Abl overexpression (Topaly et al, submitted; Barnes et al, in preparation).

Arsenic trioxide (As<sub>2</sub>O<sub>3</sub>) downregulates Bcr-Abl protein levels by translational modulation. It has been shown by various groups to enhance the selective cytotoxic effect of imatinib on CML cells. Similarly to geldanamycin and 17-AAG, it is also effective in inhibiting the growth of cell lines resistant to imatinib.<sup>33</sup>

### The *BCR-ABL* mRNA

In theory, *BCR-ABL* mRNA should be an ideal molecular target for therapy based on antisense (AS) strategies. By designing an AS oligonucleotide that is complementary to both the *BCR* and *ABL* sequences on either side of the *BCR-ABL* transcript junction it should be possible to generate a species that would hybridize to *BCR-ABL* mRNA but not to mRNA transcribed from the wild-type *BCR* or *ABL* alleles. In practice, however, conventional AS oligonucleotide approaches have failed to fulfill their promise as treatment for CML. Among the various reasons for this failure, the most important are the apparent lack of specificity of the junction AS oligos, the need to synthesize them with special chemical backbones and to introduce them into the cells via stringent permeabilization procedures, and the extremely long half-life of the Bcr-Abl protein.<sup>34</sup>

It remains to be seen whether the so-called “second generation” antisense strategies will be applicable to the treatment of CML. These include antisense molecules such as 2'-*O*-methoxyethyl RNA, locked nucleic acids and peptide nucleic acids, as well as more exotic chemical species such as morpholinos (nonionic DNA analogues in which the backbone linkages have been altered relative to the phosphodiester backbone of DNA).<sup>35</sup> A promising variation on the theme of antisense is RNA interference (RNAi). Three groups have by now reported on the use of anti-*BCR-ABL* small interfering (si) RNA oligonucleotides in *BCR-ABL*-positive cells.<sup>36-38</sup> Significant inhibition of the *BCR-ABL* message and protein has been observed in cell lines and/or primary CML cells in the 3 studies. However, the growth-inhibitory and apoptosis-inducing effects of the siRNA oligonucleotides were not as powerful as those elicited by imatinib mesylate, and it is still uncertain whether anti-*BCR-ABL* siRNAs can synergize with imatinib.<sup>36-38</sup>

Ribozymes are RNA molecules that are capable of associating with other RNA molecules by base-pairing and catalyzing the hydrolysis of specific phosphodiester bonds within the target RNA sequences. Different types of ribozymes such as hammerhead, RnaseP, and an artificial allosterically controllable ribozyme known as a “maxizyme,” have been used to target *BCR-ABL* mRNA in vitro and in murine models of leukemia.<sup>39-41</sup> Deoxyribozymes (DNAzymes), are smaller than ribozymes, more efficient enzymatically, less expensive to synthesize and more resistant to serum. In addition, DNAzymes may be generated to cleave the target sequence with a high degree of precision. In one study,<sup>42</sup> where one of the DNAzymes was designed to cleave *BCR-ABL* mRNA at a site only 1 nucleotide away from the *BCR-ABL* junction, the growth of *BCR-ABL*<sup>+</sup> CFU-Mix colonies was inhibited by 53%–80% when CD34<sup>+</sup> bone marrow cells from CML patients were transfected with these molecules.

Many of the shortcomings associated with AS oligonucleotides, particularly the lack of an efficient means of delivery, also apply to ribozymes and DNAzymes. Solutions to these problems will have to be devised in order for ribozymes or DNAzymes to become clinically useful molecular therapies. Even then, systemic administration of these agents may be inappropriate for various reasons, and their use may be confined to ex vivo applications such as purging bone marrow prior to an autologous transplant.

### Molecular Targeting of Downstream Pathways

Bcr-Abl is known to transduce its oncogenic signals through several pathways, which are then constitutively activated in a leukemic cell. It is thus conceivable that inhibition of these pathways as an alternative or in addition to Bcr-Abl inhibition may be a viable means of controlling leukemic cell proliferation.

Bcr-Abl is linked to Ras by a number of protein intermediates. Autophosphorylation of the tyrosine 177 residue of Bcr-Abl generates a binding site for the adapter protein, Grb2.<sup>43</sup> Bound Grb2 associates with the son of sevenless protein, SoS, to create a complex that stimulates activation of Ras by facilitating the exchange of GTP for GDP.<sup>44</sup> In addition, it has been demonstrated that Ras may be activated by 2 other Bcr-Abl substrates that function as adapter molecules, Shc<sup>45</sup> and CrkL.<sup>46</sup> It should be possible to uncouple Bcr-Abl from the Ras pathway by targeting these adapter molecules. The potential of this approach has been demonstrated in studies in which novel peptides were designed with the aim of blocking the SH3 domains of CrkL<sup>47</sup> and Grb2.<sup>48</sup> Both binding peptides downregulated phosphorylation of mitogen-activated protein kinase (MAPK)

and significantly inhibited the proliferation of 11 of 16 cell cultures obtained from individual CML patients. Although these studies illustrate the potential of targeting the adapter molecules that link Bcr-Abl to the central Ras-MAPK mitogenic pathway, considerable efforts will have to be made to refine the peptides before they can form the basis of a molecular therapy.

Currently, the most feasible tool for interference with the Ras pathway is represented by farnesyl transferase inhibitors (FTIs). These compounds disrupt the prenylation of Ras and other proteins that, like Ras, require this posttranslational modification to generate the functionally active, membrane associated form of the G-protein. The involvement of Ras in Bcr-Abl-induced leukemogenesis suggests that FTIs may have potential as antileukemic agents. At least 3 compounds, SCH66336 (Schering-Plough), L-744832 (Merck Research Labs), and R115777 (Janssen Research Foundation), have emerged as promising candidates for the treatment of leukemia. The largest preclinical investigations with CML cells have been done with SCH66336, which was shown to be effective against Bcr-Abl-induced acute leukemia in murine models of CML blast crisis<sup>49</sup> and p190<sup>BCR-ABL</sup> transgenic mice,<sup>50</sup> as well as in suppressing the in vitro growth of Bcr-Abl<sup>+</sup> progenitor cells from CML patients, including those from individuals who were unresponsive to imatinib treatment.<sup>51</sup> Furthermore, SCH66336 potently sensitized imatinib-resistant cells to imatinib-induced apoptosis. Taken together, these findings suggest that a combination of SCH66336 and imatinib can be a useful treatment for CML, especially in cases of imatinib resistance. Several lines of evidence suggest that the antiproliferative action of SCH66336 in Bcr-Abl<sup>+</sup> cells must also involve protein targets other than Ras, and that the potent antitumor activity of FTIs derives from a more complex and subtle mode of action than was originally thought to be the case. In fact, even when farnesyl transferase is inhibited, Ras can be transferred to the membrane by an alternative prenylation pathway employing geranylgeranyl transferase-1 to successfully transduce Bcr-Abl signals. Therefore, bisphosphonates, developed primarily to treat bone diseases, became an attractive option as anticancer drugs for their capacity to inhibit the activation of Ras proteins through suppression of both geranylgeranylation and farnesylation. Zoledronate, a third-generation bisphosphonate, was recently shown to be a potent inhibitor of the proliferation of *BCR-ABL*<sup>+</sup> cells both in vitro and in mouse models, and to augment synergistically the antileukemic activity of imatinib.<sup>52</sup>

Ras is linked to the MAPK pathway by the serine-threonine kinase, Raf-1, which activates the MAPK

kinases, MEK-1/2, by catalyzing their phosphorylation. Specific inhibitors of MEK have been developed, and 3 of these compounds, PD098059, PD184352 (Pfizer), and U0126 (DuPont Merck) have been shown to inhibit the proliferation of CML cell lines and to produce a synergistic cytotoxic effect with imatinib even in some imatinib-resistant cell lines.<sup>53,54</sup>

Another signaling molecule that is activated by Bcr-Abl is phosphatidylinositol-3 (PI-3) kinase. PI-3 kinase is a heterodimer consisting of a catalytic (p110) and a regulatory (p85) subunit; Bcr-Abl associates with PI-3 kinase via the p85 subunit. Two PI-3 kinase inhibitors, wortmannin and LY294002 (Lilly), have been shown to synergize with imatinib in the suppression of in vitro growth of *BCR-ABL*<sup>+</sup> cell lines and progenitor cells from CML patients.<sup>55,56</sup> Wortmannin is not suitable for in vivo clinical applications because it is highly unstable in solution. It has yet to be established whether the synthetic PI-3 kinase inhibitors can be used as therapeutic agents for the treatment of CML; although they are more stable than wortmannin they are far less potent than this naturally occurring prototype. An alternative may be to use inhibitors of PI-3 kinase effectors, such as Bad, mTor, Fkhr, NF- $\kappa$ B, GSK3b, and MDM2, all of which have been shown to be associated with Bcr-Abl transformation. Thus, rapamycin, an inhibitor of mTor already in Phase I/II clinical trials for a number of cancers,<sup>57</sup> was found to also enhance imatinib-mediated killing of CML cells, and may be effective in cases where resistance to imatinib is due to *BCR-ABL* overexpression.<sup>58</sup>

A final mention should be made of 2 additional compounds reported as potentially useful for the treatment of CML. The first is AG490, a Jak-2 inhibitor; the second is flavopiridol, an inhibitor of cyclin-dependent kinases. Whereas neither compound acts on pathways exclusively and directly activated by Bcr-Abl, combination of each one with imatinib produced synergistic effects on suppression of proliferation and induction of apoptosis in *BCR-ABL*<sup>+</sup> cells.<sup>59,60</sup>

## II. MOLECULAR MONITORING OF RESPONSE TO IMATINIB AS A GUIDE TO CLINICAL MANAGEMENT

Timothy P. Hughes, MD\*

The treatment guidelines for patients with CML are undergoing substantial change<sup>61-64</sup> due to emerging evidence regarding the effectiveness and safety of

---

\* Institute of Medical and Veterinary Science, Division of Hematology, Frome Road, Adelaide 5000, SA, Australia

imatinib mesylate. This drug has shown activity in all phases of CML but the most substantial and stable responses are seen in newly diagnosed patients in the chronic phase.<sup>65-69</sup>

Despite the widespread use of imatinib in CML it is still too early to know what level of response can be used as an indication of long-term disease control and what should be regarded as treatment failure. The therapeutic targets established for interferon alpha (IFN- $\alpha$ ) therapy are based on the results of bone marrow cytogenetic studies. Major cytogenetic response (MCR  $\leq$  35% Ph<sup>+</sup> marrow metaphases) and complete cytogenetic response (CCR = no Ph<sup>+</sup> marrow metaphases) have been verified as reliable surrogate measures for long-term survival in patients treated with IFN- $\alpha$ .<sup>70,71</sup> It will be several years before we can determine whether these cytogenetic responses have equivalent long-term prognostic value for imatinib-treated patients. Current results suggest they are predictive of progression-free survival for imatinib-treated patients, at least in the short term. Chronic phase CML patients achieving MCR on imatinib have a significantly lower risk of progression in the subsequent 24 months than patients not achieving MCR.<sup>66</sup> In a prospective multicenter randomized Phase 3 trial designated the Novartis IRIS study 1106 newly diagnosed CML patients were treated with 400 mg/day of imatinib or IFN- $\alpha$  plus low-dose cytarabine (Ara-C). The observed CCR rate for the imatinib arm was 76% compared to 15% for the IFN- $\alpha$  plus Ara-C arm (median follow-up 18 months).<sup>69</sup> If CCR achieved on imatinib proves to be equally predictive of long-term disease control, as has been the case for IFN- $\alpha$ -induced CCR, then the survival advantage with imatinib will be dramatic, but this is not yet proven.

One major concern regarding imatinib therapy is the development of resistance.<sup>65,68</sup> The commonest cause of acquired resistance appears to be mutations in the *BCR-ABL* kinase region.<sup>13-16,72-75</sup> The risk of mutation development is particularly high in patients who are beyond chronic phase as well as those with a long duration of disease prior to imatinib therapy.<sup>75</sup>

The excellent responses seen with imatinib in newly diagnosed patients has led to a reluctance to consider allogeneic transplant before the patient has received a trial of imatinib therapy (discussed in Section III). This makes it particularly important that emerging imatinib resistance is recognized early so that transplant options can be considered before there is overt progression of the disease. Conversely, profound reductions in the leukemic cell burden are likely to predict long-term disease control, and patients who achieve this level of response need to be identified so that more hazardous therapeutic options can be avoided or deferred.

### Monitoring with Quantitative RT-PCR

Competitive or real-time quantitative RT-PCR (Q-PCR) has been previously used to serially monitor response in patients receiving IFN- $\alpha$  and recipients of allogeneic stem cell transplants (allo-SCT).<sup>76-82</sup> On IFN- $\alpha$  therapy, the *BCR-ABL* transcript level in the blood correlates strongly with the percentage of Ph<sup>+</sup> metaphases in the marrow.<sup>80</sup> Rising levels of *BCR-ABL* transcripts post-allo-SCT is strongly predictive of cytogenetic and hematological relapse.<sup>83,84</sup> Real time Q-PCR has superseded competitive Q-PCR in most laboratories. The accuracy and reliability of real-time Q-PCR as a measure of *BCR-ABL* transcript level is highly dependent on the quality control procedures carried out by the laboratory. Reliable and consistent Q-PCR results require thorough validation of all aspects of the procedure. The most significant factor to ensure accuracy is the normalization of the results to an appropriate control gene, in order to compensate for variations in the quality of the RNA and the efficiency of the reverse transcription reaction. The 2 control genes that have been widely assessed are *BCR* and *ABL*. Both seem to be suitable in that they are expressed at low level and have similar stability to *BCR-ABL*.

### Correlation Between Cytogenetics and Q-PCR

Recent studies on patients treated with imatinib have shown a strong correlation between the percentage of Ph<sup>+</sup> metaphases in the bone marrow and peripheral blood *BCR-ABL* levels measured by Q-PCR.<sup>85-88</sup> When the Q-PCR values in imatinib treated patients were grouped according to the cytogenetic response categories, very little overlap was observed in the *BCR-ABL* levels within the cytogenetic categories among 76 patients who had simultaneous blood Q-PCR and marrow cytogenetics.<sup>88</sup> Patients in CCR ( $n = 28$ ) had *BCR-ABL/BCR* values below 1% with only 1 exception whereas only 2/48 patients not in CCR had *BCR-ABL/BCR* values below 1%. In a UK study, 40/42 patients in CCR had *BCR-ABL/ABL* values less than 2%.<sup>93</sup> Two other studies<sup>85,87</sup> have also confirmed that the *BCR-ABL/ABL* ratios of patients achieving complete, partial, and minor cytogenetic responses differed significantly, but the range of *BCR-ABL* values for patients in CCR appeared to be less tightly clustered.

### Are Regular Marrow Cytogenetic Studies Still Needed?

Additional chromosomal abnormalities in the Ph-positive cells can sometimes be observed in patients on imatinib therapy. Whether these additional chromosomal abnormalities are always clinically significant remains uncertain but in some cases they herald dis-

ease progression. Recently there has been a recognition that additional chromosomal abnormalities can also be observed in Ph-negative metaphases.<sup>89-92</sup> Clonal karyotypic abnormalities were found in 7/46 patients (15%) who achieved cytogenetic responses on imatinib, and 2 of these patients had clinical features of myelodysplasia.<sup>92</sup> It is probable that Ph-negative clonal abnormalities will be less common in patients treated with imatinib in early chronic phase. However, given the current level of uncertainty, there is still a role for frequent (at least 6 monthly) monitoring of bone marrow cytogenetics, at least until we have a better understanding of the incidence and clinical significance of clonal cytogenetic abnormalities in Ph-negative cells.

### How Should Responding Patients Be Monitored and Managed?

#### Definitions of molecular response categories

In the molecular analysis of the IRIS study “major molecular response” was defined as a  $\geq 3$  log reduction in *BCR-ABL/BCR* level when compared to the median pretreatment level. The latter was calculated by measuring the level of *BCR-ABL/BCR* in 30 patients from blood taken just prior to commencement of the study. In other studies a *BCR-ABL/ABL* ratio of 0.045% has been used to define a major molecular response. This is based on a study of IFN- $\alpha$ -treated patients who were in CCR where the median value of *BCR-ABL/ABL* in patients who maintained stable CCR was 0.045%.<sup>81</sup> A 3-log reduction below baseline is in fact similar to the level defined by the Hochhaus study. The advantage of defining molecular response according to reduction from a median pretreatment level is that once a laboratory has established their median baseline level, results can be expressed on a common scale internationally. Another advantage is that molecular response can be calculated without needing to know the actual baseline level for that particular patient.

The terms “PCR negative” and “complete molecular response” should be used with caution. They imply an absolute lack of measurable leukemia, which may be misleading. There is inherent variability in the sensitivity of Q-PCR and nested PCR assays between laboratories and between samples. In addition, with technological advances, there will be further improvements in our ability to detect low numbers of *BCR-ABL* transcripts so that “PCR negative” will have different significance as technology advances. Using current technology, sensitivity of  $> 4.5$  logs below baseline can usually be achieved. In the IRIS study a *BCR-ABL* level 4.5 logs below baseline was defined as the maximum measurable response. We have called this a “4.5 log

response” so that it can be differentiated from much more substantial molecular responses that may be verifiable in future studies using improved technology.

### Frequency of molecular responses

Major molecular response as defined in the IRIS study ( $\geq 3$  logs below baseline) was achieved in 39% of newly diagnosed CML patients after 12 months of imatinib therapy compared to only 2% of patients on the IFN- $\alpha$  + Ara-C arm (Figure 3; see Appendix, page 599). For the IRIS study, a reduction in *BCR-ABL* level of  $\geq 4.5$  logs was detected and verified on at least 1 occasion in 3.6% of patients who were in CCR (follow-up 18 months). Given the steady downward trend in median *BCR-ABL* levels for patients in CCR, the number achieving a 4.5 log response will probably increase significantly with longer follow-up. Similar percentages of patients who have undetectable *BCR-ABL* have been reported in smaller studies.<sup>85,93</sup> At the MD Anderson Cancer Center, 13% of chronic phase patients who received imatinib at 400 mg/day had undetectable *BCR-ABL* on real-time and nested PCR. Furthermore, in a pilot study of imatinib 800 mg/day for chronic phase CML patients who have failed IFN- $\alpha$ , 41% of patients had undetectable *BCR-ABL* (median follow-up 14 months).<sup>94</sup>

### Prognostic Significance of Cytogenetic and Molecular Responses

Patients who achieve CCR appear to have a good prognosis. Imatinib-treated patients in the IRIS study who did not achieve CCR by 12 months had a 15% probability of progression (to acute phase or loss of com-

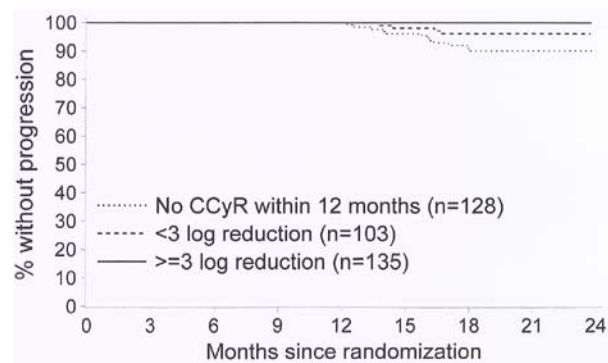

**Figure 4. Landmark analysis looking at the actuarial probability of disease progression (death during treatment, progression to accelerated or blast phase of chronic myeloid leukemia [CML], loss of complete hematologic or major cytogenetic response or increase in white blood cells [WBC]) according to the level of cytogenetic and molecular response after 12 months of imatinib ( $P < .001$ ; log-rank test).**

Abbreviations: CCyR, complete cytogenetic response

plete hematologic remission or MCR) over the subsequent 12 months compared to a 3% probability of progression for patients in CCR at 12 months.

Early reduction of *BCR-ABL* transcript levels is predictive of subsequent cytogenetic response in chronic phase patients.<sup>85,86,88</sup> Merx et al analyzed 364 blood samples in 106 patients. They found that the *BCR-ABL* level at 2 months predicted for MCR at 6 months ( $P = .006$ ).<sup>85</sup> In the IRIS study, prognosis was better for the subset of imatinib-treated IRIS patients in CCR who also achieved a  $\geq 3$  log reduction from baseline levels. This was observed in 58% of patients in CCR after 12 months of imatinib therapy and was associated with a 100% probability of remaining progression free over the subsequent 12 months ( $n = 135$ ), whereas patients in CCR who did not achieve a  $\geq 3$  log reduction in *BCR-ABL* had a 5% probability of progression ( $n = 103$ ) (Figure 4). In the same study, 79/83 imatinib-treated patients (95%) who achieved  $\geq 3$  log reductions maintained or improved the response on subsequent testing 3-12 months later.<sup>95</sup>

### What Should Be the Goal of Imatinib Therapy?

While CCR or major molecular responses are useful initial goals of therapy, they may not prove to be stable in the long term. Persistent leukemia at any level may eventually be the source of resistant clones. Complete eradication of leukemia would be the optimal outcome of therapy but this is not a verifiable goal. A practical and testable treatment endpoint would be sustained absence of *BCR-ABL* by the most sensitive and reliable assay available. While it may be reasonable to maintain imatinib therapy at standard dose for patients in CCR, it would be valuable to formally assess higher doses of imatinib or combination therapy in patients where leukemia remains detectable at the molecular level and is not steadily falling.

If the goal of undetectable *BCR-ABL* is achieved, the question will arise as to when imatinib can be safely stopped. It should be remembered that a patient may still have several million leukemic cells in the bone marrow without these being detectable by the most sensitive assays currently available. If still present, these residual leukemic cells are very likely to be capable of steady expansion in the absence of imatinib. Outside of properly conducted clinical trials, imatinib should be continued long term, until more is known about the stability of molecular response off therapy. A study looking at imatinib cessation in patients with undetectable *BCR-ABL* for several years would determine how frequently (if ever) imatinib was able to effectively eradicate CML. While accepting that it may not often be achievable, the ultimate aim of therapy in CML should



be long-term absence of measurable leukemia after cessation of therapy.

## Approach for Patients with Imatinib-Resistance

### Primary resistance

In the context of newly diagnosed patients, failure to achieve complete hematologic remission by 3 months, and failure to achieve MCR by 6 or CCR by 12 months can be defined as primary resistance. The frequency of primary resistance appears to be dose dependent. In the IRIS study,<sup>69</sup> 4% of previously untreated patients did not achieve complete hematologic remission on imatinib 400 mg/day. Failure to achieve MCR by 6 months was seen in 23% of newly diagnosed patients; with continuing imatinib at 400 mg/day, 40% of this group still failed to achieve MCR by 24 months. Failure to achieve CCR by 12 months was seen in 31% of imatinib treated patients in the IRIS study. Thus, overall around 20%–30% of newly diagnosed patients appear primarily resistant to imatinib at 400 mg/day. When 36 chronic phase patients who had failed IFN- $\alpha$  therapy were treated with imatinib 800 mg/day in an MD Anderson study,<sup>94</sup> no cases of failure to achieve CHR were reported, and only 11% did not achieve CCR. Thus, it seems likely that the proportion of patients with primary resistance can be reduced with the use of higher doses of imatinib. Overall, approximately 90% of newly diagnosed patients might achieve these specified response levels on higher doses of imatinib. The reason at least 10% of patients have primary resistance despite higher doses of imatinib is not clear. No mutations or polymorphisms in *BCR-ABL* that would explain the lack of response in these patients have been identified to date.<sup>75</sup>

### Acquired resistance

This can be defined as the loss of an established hematologic, cytogenetic, or molecular response as well as progression to accelerated or blast phase. In the IRIS trial, 8% of imatinib-treated patients had acquired resistance by 18 months.<sup>69</sup> In a recent survey of imatinib-treated chronic phase patients, the incidence of acquired resistance in early and late chronic phase patients was 15% and 25% respectively (median follow-up 14 months).<sup>75</sup>

Loss of response to imatinib could be due either to the expansion of resistant CML cells that are not dependent on *BCR-ABL* for their transforming activity, or to the selection and expansion of CML cells that have by various means excessively activated Bcr-Abl kinase activity despite imatinib. Most studies in patients with

acquired resistance have shown the appearance of a clone of cells with fully active *Bcr-Abl* kinase.<sup>13,16,17</sup> This can be achieved by increasing the expression of *BCR-ABL* by chromosome or gene amplification. This appears to be the commonest mechanism in experimentally induced imatinib resistance,<sup>10,11,96</sup> but is less frequently observed in the clinical setting. In a German survey of resistant cases 19/36 patients had additional chromosomal changes (8 involved additional copies of the Ph chromosome), and genomic amplification was demonstrated by FISH in 2/32 patients.<sup>16</sup> In this survey, 23/66 patients (34%) had point mutations in *BCR-ABL* that led to increased kinase activity. Other studies have found that mutations in the kinase region of *BCR-ABL* are the commonest cause of acquired resistance<sup>14,15,75</sup> (**Table 1**).

### Incidence and Significance of BCR-ABL Mutations

In an Australian survey, 144 CML patients from all phases of the disease who had received at least 6 months of imatinib were tested for *BCR-ABL* kinase domain mutations by direct sequencing, regardless of their response to therapy. Mutations were detected in 27 patients at 17 different residues, 13/40 patients (33%) in accelerated phase, 14/64 patients (22%) in late-chronic phase (> 12 months from diagnosis until imatinib started), and 0/40 patients in early-chronic phase. Acquired resistance was evident in 24/27 (89%) patients with mutations. This tight correlation between mutation development and onset of resistance strongly suggests a causal role for the mutations in acquired resistance to imatinib. Patients who commenced imatinib more than 4 years from diagnosis had a significantly higher incidence of mutations (18/44; 41%) compared to those treated within 4 years (9/100; 9%) ( $P < .0001$ ). This supports the concept that the leukemic clone accumulates sequence errors during DNA replication, some of which affect *BCR-ABL*. The probability of developing subclones that are imatinib resistant would relate to the duration of disease and the size of the stem cell pool at risk. Gradually, a pool of *BCR-ABL* mutants would be generated which, if they have a lower affinity for imatinib, would selectively expand in the setting of imatinib treatment.

### Screening for BCR-ABL Mutations

The emergence of clones with mutated *BCR-ABL* is a common cause of resistance in patients with advanced phase CML and those in late chronic phase (**Table 1**).<sup>13,14,16,72-75,97</sup> It is too early to determine whether mutations will emerge as a common problem for patients treated in early chronic phase.

**Table 1. Point-mutations in the *BCR-ABL* kinase domain associated with imatinib resistance in chronic myeloid leukemia (CML) and Ph<sup>+</sup> acute lymphoblastic leukemia (ALL) patients.**

| Nucleotide Change* | Amino Acid Change† | Proposed Mechanism of Resistance  | No. of Cases (Detected/Tested)‡                           | Refs.                                   |
|--------------------|--------------------|-----------------------------------|-----------------------------------------------------------|-----------------------------------------|
| A1094G             | M244V (M263V)      | Impairs conformational change (?) | 1/32<br>1/66<br>1/27                                      | 14<br>16<br>75                          |
| C1106G             | L248V (L267V)      | Impairs conformational change     | 1/27                                                      | 75                                      |
| G1113A             | G250E (G269E)      | Impairs conformational change     | 2/28<br>2/32<br>2/27                                      | 15<br>14<br>75                          |
| A1119G             | Q252R (Q271R)      | Impairs conformational change     | 1/32                                                      | 14                                      |
| G1120C/T           | Q252H (Q271H)      | Impairs conformational change     | 6/32<br>1/66<br>5/27                                      | 14<br>16<br>75                          |
| T1121C             | Y253H (Y272H)      | Impairs conformational change     | 2/8<br>1/28<br>2/32<br>4/66                               | 72<br>15<br>14<br>16                    |
| A1122T             | Y253F (Y272F)      | Impairs conformational change     | 3/32<br>1/66<br>2/27                                      | 14<br>16<br>75                          |
| G1127A             | E255K (E274K)      | Impairs conformational change     | 1/12<br>2/8<br>4/28<br>6/9<br>10/32<br>3/66<br>2/27       | 97<br>72<br>15<br>142<br>14<br>16<br>75 |
| A1128T             | E255V (E274V)      | Impairs conformational change     | 1/8<br>1/66<br>1/27                                       | 72<br>16<br>75                          |
| T1495C             | F311L (F330L)      | Unknown                           | 1/24                                                      | 73                                      |
| C1308T             | T315I (T334I)      | Affects imatinib binding          | 2/8<br>10/32<br>3/28<br>1/9<br>3/24<br>73<br>6/66<br>2/27 | 72<br>14<br>15<br>141<br>16<br>75       |
| C1315G             | F317L (F336L)      | Affects imatinib binding          | 1/28<br>3/32                                              | 15<br>14                                |
| T1392C             | M343T (M362T)      | Unknown                           | 1/32                                                      | 14                                      |
| T1416C             | M351T (M370T)      | Impairs conformational change     | 2/28<br>10/32<br>1/24<br>4/66<br>7/27                     | 15<br>14<br>73<br>16<br>75              |
| A1428G             | E355G (E374G)      | Impairs conformational change     | 1/32<br>1/66<br>2/27                                      | 14<br>16<br>75                          |
| T1439G             | F359V F378V)       | Affects imatinib binding (?)      | 2/32<br>2/27                                              | 14<br>75                                |
| G1499A             | V379I (V398I)      | Impairs conformational change (?) | 1/32                                                      | 14                                      |
| T1508C             | F382L (F401L)      | Unknown                           | 1/32                                                      | 14                                      |
| T1523A             | L387M (L406M)      | Impairs conformational change (?) | 1/32                                                      | 14                                      |
| A1551G             | H396R (H415R)      | Impairs conformational change (?) | 3/32<br>1/66<br>1/27                                      | 14<br>16<br>75                          |
| C1614A             | S417Y (S436Y)      | Unknown                           | 1/27                                                      | 75                                      |
| G1739A             | E459K (E478K)      | Unknown                           | 1/27                                                      | 75                                      |
| T1821C             | F486S (F505S)      | Unknown                           | 1/27                                                      | 75                                      |

So far no preimatinib screening test has been developed that has demonstrated predictive value for subsequent resistance. Even though it is likely that in many cases the mutant clone is present prior to imatinib therapy, direct sequencing of the *BCR-ABL* kinase region prior to imatinib therapy does not appear to indicate patients at risk.<sup>75</sup> This may be because the sensitivity of direct sequencing will not generally allow detection of a mutant population which is less than 10–20% of the total population of leukemic cells. At present, (1) phase of disease, (2) duration of CML prior to imatinib therapy, and (3) initial response to imatinib provide the best indication of the risk of mutation development. Serial mutation screening once imatinib is commenced may be valuable in high-risk cases, but in nearly all patients a significant rise in *BCR-ABL* levels is seen around the time of mutation detection and may be used as an indication of the need for mutation screening.

### Significance of emerging mutations

For patients who develop resistance, a search should be made for the cause. Direct sequencing of the *BCR-ABL* kinase domain should reveal any emerging mutant clones. If mutations are identified, the appropriate response will depend on the actual amino-acid change. Nearly all mutations that become detect-

\* Positions according to GenBank no. M14752.

† Positions according to GenBank no. AAB60394 for ABL type 1a, and in brackets the corresponding position for Abl type 1b (where the N-terminal domain is 19-amino acids longer).

‡ Among patients who developed resistance or never responded to imatinib. The table collates data from 8 independent series where patients were screened for DNA mutations in the tyrosine kinase region of Bcr-Abl. A total of 149 mutational events were reported in these 206 patients (with a few cases exhibiting more than 1 mutation in the resistant clone). This indicates that point mutations in the kinase domain account for approximately 72% of the cases where lack or loss of response to imatinib is observed in the clinic. No mutations were yet detected in primary or acquired resistance of patients in early chronic phase.

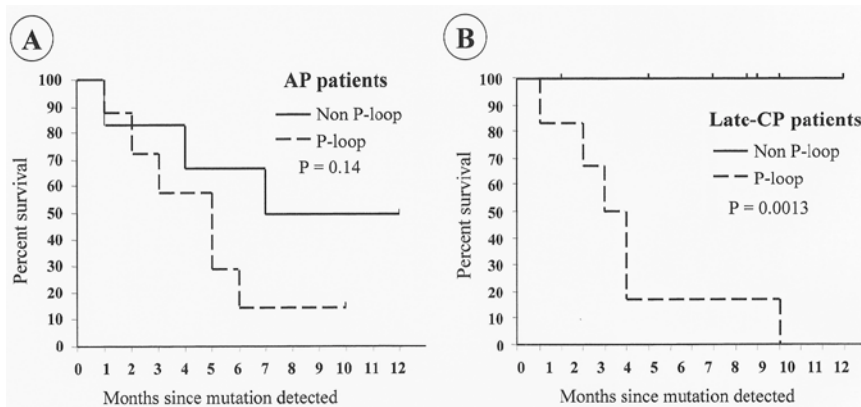

**Figure 5. Kaplan-Meier survival curves for patients with mutations.**

(A) There was a significant difference in the survival rate of late-CP patients with P-loop and non-P-loop mutations. (B) The difference in the survival rate for AP patients did not reach significance.

Abbreviations: AP, accelerated phase; CP, chronic phase

able by direct sequencing are associated with evidence of loss of molecular response. The commonest pattern when first detected is a mix of mutant and wild type *BCR-ABL* cells, but with continued imatinib therapy the mutant clone usually predominates.<sup>75</sup> Detection of mutations that completely prevent imatinib binding (e.g., T315I) should probably lead to cessation of imatinib and the use of other therapy. Patients with mutations that have less marked effects on imatinib binding (e.g., M244V, F311L, M351T, F317L, E355G, F359V)<sup>14,99,100</sup> may respond to increased doses of imatinib.<sup>75</sup> The ATP phosphate binding loop (P-loop) is a highly conserved region of the kinase domain involved in ATP binding and is a frequent site of mutations. Mutations in the P-loop (amino acids 250-255) may have a particularly poor prognosis.<sup>75</sup> In the Australian survey, 12/13 patients (92%) with mutations in the P-loop died, with a median survival of 4.5 months after the mutation was detected. In contrast, only 3/14 patients (21%) with mutations outside the P-loop died (median follow-up of 11 months) (Figure 5). Patients with no evidence of mutation had a 3% mortality with a similar follow-up.

### Conclusions

Based on the accuracy and sensitivity of Q-PCR for measuring *BCR-ABL* levels in peripheral blood, this should become the method of choice for monitoring patients on imatinib and will facilitate comparisons of different imatinib-based treatment strategies. At the individual patient level, Q-PCR studies can identify degrees of molecular response that predict long-term stability, as well as patterns of response that provide an early indication of relapse and imatinib resistance. For patients with acquired resistance, a search for *BCR-ABL* mutations is warranted both to guide future therapy and to further our understanding of the biological and clinical impact of these emerging mutant clones.

### III. MANAGING CML WITH PATIENT-SPECIFIC STRATEGIES

Jane F. Apperley, MBChB\*

It is highly unusual that the introduction of novel, effective, and safe therapies for any malignancy results in controversy regarding the optimal management of the disease. However, this seems to be the current situation for CML. The development of imatinib has the potential to revolutionize the management of CML and other disorders resulting from the deregulation of 1 of the tyrosine kinase targets of this drug. However, the long-term outcome for patients with CML treated with imatinib alone is unknown—hence the dilemma. In advocating imatinib as the treatment of choice for all patients with CML we may deny individual patients the chance of cure by a long-standing and universally accepted therapy, namely allogeneic stem cell transplantation (allo-SCT). As new information becomes available from patients treated with imatinib from diagnosis, we must try to develop a wide range of prognostic indicators to help distinguish patients for whom the apparently safe option is not necessarily the correct option, from those destined to have prolonged survival with targeted drug therapy.

Furthermore, the introduction of imatinib into clinical practice has raised a number of other questions, including the optimal use of this drug in terms of dose, dosing schedules, duration of treatment, definitions of response and conversely failure, and the continuing management of patients who fail to achieve molecular responses. The answers to these dilemmas are not yet available and the future of management of CML will

\* Imperial College of Medicine, Hammersmith Hospital, Department of Haematology, Du Cane Road, London W12 0NN, UK

depend on the rapid accumulation of data from clinical studies and their objective interpretation. In this section we will attempt to set out these questions and begin to suggest tools that might be used to determine the answers.

### How Should the Newly Diagnosed Patient Be Managed?

In the future, randomized trials for the use of imatinib in higher doses or in combination with other agents will be available. Small Phase II studies of the safety and feasibility of giving imatinib in combination with interferon (IFN)- $\alpha$  or cytosine arabinoside (Ara-C) have now been completed and form the basis of a large multinational study, known as SPIRIT. The full protocol will have 4 arms, comparing imatinib 400 mg/day with imatinib 600-800 mg/day, imatinib in combination with pegylated IFN- $\alpha$ , and imatinib in combination with Ara-C. The study has commenced in France and hopefully will begin recruiting patients in the United Kingdom in the latter part of 2003. A similar four-arm study will

soon be activated in the US.

In the meantime, decisions must be made concerning the management of newly diagnosed patients. At the present time there are broadly two approaches to the management of the newly diagnosed patient. The first is to offer all patients a trial of imatinib and offer transplant only to those patients who fail treatment according to a preestablished set of guidelines for lack or loss of response. The second is to continue to discuss up-front allogeneic transplant with selected groups of individuals for whom more aggressive therapy is deemed appropriate.

### Should Every Patient Have a Trial of Imatinib?

The advantages of recommending imatinib as first-line therapy for all newly diagnosed patients are clear (Table 2). The results of the IRIS study of imatinib alone versus IFN- $\alpha$  plus Ara-C<sup>69</sup> showed that the chance of remaining progression free at 18 months was 97% for patients receiving imatinib alone versus 93% for those given IFN- $\alpha$  plus Ara-C. This was associated with a

**Table 2. Advantages and disadvantages of two up-front therapeutic approaches to chronic myeloid leukemia (CML).**

| Approach                           | Advantages                                                                                                                                          | Disadvantages                                                                                                                                                                                        |
|------------------------------------|-----------------------------------------------------------------------------------------------------------------------------------------------------|------------------------------------------------------------------------------------------------------------------------------------------------------------------------------------------------------|
| Allo-SCT for selected patients     | Proven curative ability<br>Decreased risk of progression of disease<br>Ability to integrate imatinib, RICT and DLI<br>Psychological (some patients) | Transplant-related mortality<br>Transplant-related morbidity<br>Chronic graft-versus-host disease<br>Late effects (e.g., secondary malignancy, endocrine imbalance, cataract formation)              |
| Trial of imatinib for all patients | Avoids transplant-related mortality and morbidity for some<br>Psychological (some patients)                                                         | No long-term survival data<br>Curative ability unknown<br>Emerging resistance<br>Delaying curative therapy<br>Risk of progression<br>Allo-SCT more likely to be performed for advanced phase disease |

Abbreviations: Allo-SCT, allogeneic stem cell transplantation; RICT, reduced intensity conditioning transplantation; DLI, donor lymphocyte infusion

**Table 3. Clinical definitions of resistance.**

| Primary                                                                                                                           | Acquired                                                                                                                                 |
|-----------------------------------------------------------------------------------------------------------------------------------|------------------------------------------------------------------------------------------------------------------------------------------|
| Absence of a hematologic response within 3 months of starting treatment with at least 300 mg/day                                  | Loss of hematologic response                                                                                                             |
| Failure to achieve at least a minor cytogenetic response (> 35% Ph-negativity) after 3 months' treatment with at least 400 mg/day | Loss of a complete cytogenetic response                                                                                                  |
| Failure to achieve a major cytogenetic response after 6 months' treatment with at least 400 mg/day                                | An increase of 30% or more in the number of Ph-positive bone marrow metaphases examined at intervals of 3 months or longer               |
| Failure to achieve a complete cytogenetic response after 12 months' treatment with at least 400 mg/day                            | Acquisition of new cytogenetic abnormalities in the Ph-positive clone                                                                    |
|                                                                                                                                   | An increase in the <i>BCR-ABL</i> /control gene ratio of one log or more on serial testing or to the range associated with Ph-positivity |

considerable increase in the proportion of patients achieving MCR and CCR at 87% and 76% for imatinib alone versus 34% and 15% for IFN- $\alpha$  plus Ara-C ( $P < .001$ ). By giving all newly diagnosed patients imatinib, the immediate morbidity and mortality of allo-SCT will be avoided, perhaps indefinitely, for some patients.

The disadvantages are also apparent. Despite the encouraging results of the IRIS study, 20-30% of newly diagnosed patients fail to achieve such a good response.<sup>69</sup> Furthermore, a number of questions concerning imatinib remain outstanding, not least of which is whether the occurrence of MCR and CCR will translate into a survival advantage. As mentioned earlier, although the majority of patients achieve hematologic and cytogenetic remission, a very small proportion achieve reverse transcriptase polymerase chain reaction (RT-PCR) negativity for *BCR-ABL*.<sup>95</sup> This is in contrast to RT-PCR results in long-term survivors of allo-SCT,<sup>101,102</sup> and raises the possibility that the effects of imatinib may not be durable. Alongside these considerations are concerns regarding the development of resistance to imatinib.<sup>13-16,75</sup>

In pursuing a strategy of offering a trial of imatinib to all patients it is important to have clear definitions of both “response to” and “failure of” treatment (**Table 3**), and a plan for managing both of these situations. There are some patterns of patient response (or lack of response) that can be considered failure of treatment without controversy. Any patient who has achieved a degree of response, hematologic, cytogenetic, or molecular, and then loses this response while still on treatment, should be considered at risk of disease progression. An individual who fails to achieve hematologic control is also unlikely to do well in the long term. However, patients who have partial and/or gradual changes in their cytogenetic responses are more difficult to classify. Previously, we arbitrarily decided that those patients who had not achieved an MCR at 12 months, were imatinib “failures.”<sup>103</sup> More recently we have altered our definition of treatment failure to a lack of CCR after 12 months of treatment at 400 mg/day. This change has been prompted by the relatively small increase in the proportion of patients achieving CCR at 18 months (76%) compared to 12 months (69%) in the IRIS study and by the knowledge that the best outcome of allo-SCT is found in patients transplanted within 1 year of diagnosis.<sup>104,105</sup> It would, therefore, be preferable to reduce the duration of an imatinib trial to less than 12 months. Furthermore, there are data to suggest that the rapidity of response may in itself be a prognostic indicator of the likelihood of achievement of MCR and therefore possibly of progression-free survival.<sup>85,86</sup> In the future, there may be additional features of re-

sponse to treatment in newly diagnosed patients that might be used to guide management. For instance, we have studied the outcome of patients treated with imatinib after ‘failure’ of IFN- $\alpha$  at our own institution, and feel that for this particular group, we can identify relatively early in their treatment, patients who are unlikely to achieve MCR or CCR. The 2 most important predictive factors appeared to be a failure to obtain at least a minor cytogenetic remission ( $\geq 35\%$  Ph-negativity) after 3 months of treatment, and the development of neutropenia during this time.<sup>106</sup> These 2 features were used to develop a prognostic score in which patients could score 2 (high risk), 1 (intermediate risk), or 0 (low risk) points. At 18 months, the probabilities according to risk group were 100%, 90% (CI 79%-95%) and 53% (CI 44%-63%) ( $P = .0002$ ) for survival and 100%, 75% (CI 62%-85%) and 30% (CI 20%-44%) ( $P < .0001$ ) for progression-free survival, respectively. Although highly predictive in these individuals, we have no information as to whether such a prognostic score will be applicable to newly diagnosed patients.

### Is There a Role for Up-Front Transplant?

A logical approach to this question would be to restrict up-front transplantation to those patients likely to do extremely well with allo-SCT (and for whom it might be misguided to offer them an alternative therapy) and those likely to do poorly with imatinib. The question remains as to whether these two groups can be accurately identified.

The factors influencing the outcome of allo-SCT are well recognized. Age, disease status, disease duration, recipient-donor gender combinations, and the source of the transplant product have all been identified as significantly influencing long-term survival.<sup>105</sup> In recipients of unrelated transplant, cytomegalovirus (CMV) serostatus is also influential.<sup>107</sup> Young patients with CML in chronic phase within the first year of diagnosis who have HLA-identical donors should continue to be offered allo-SCT. The area of debate must be the definition of “young.” For recipients of sibling transplant, this might be up to 45 years of age, and up to 35 years for patients with unrelated donors. If the Sokal or Hasford scores<sup>108,109</sup> at diagnosis suggest a good prognosis, then the ages might be reduced. In contrast, for unrelated transplant if both donor and recipient are CMV negative and HLA-matched by high resolution typing, the definition of “young” might be more liberal.

The early identification of patients likely to do badly with imatinib is more problematic and probably impossible at this time. It is possible that Sokal and/or Hasford scores will be found to correlate with outcome of treatment with imatinib, and could be used to distinguish

groups of patients at diagnosis. Huntly et al have previously reported that the presence of derivative chromosome 9q+ deletions at diagnosis is associated with adverse outcome on conventional therapy.<sup>110</sup> More recently this group was unable to document a difference in survival after treatment with imatinib for patients with or without a deletion. However, a decrease in the proportion of patients achieving hematologic and cytogenetic responses and an increased rate of progression on imatinib were observed in the presence of the deletion suggesting that, with time, a difference in survival might become apparent.<sup>111</sup>

With the advent of gene expression profiling it might be possible to identify a pattern associated with early disease progression on imatinib. However, if this were related to the presence of very small numbers of resistant cells with point mutations in the kinase domain of *BCR-ABL*, the nature of the micro-array assays would preclude their detection.

### **What Is the Place of Reduced Intensity Transplant Procedures?**

Recent developments in reduced intensity conditioning transplantation (RICT) procedures also cloud the issue of early transplant. In theory, the concept of the gradual ablation of host hematopoiesis by donor T cells present in the original graft, or arising in the post-transplant period, or by additional lymphocyte infusions, should have its optimal outcome in CML. Evidence to support this has been somewhat delayed, probably due to the introduction of imatinib into clinical practice, and a reluctance to subject these patients to an experimental technique. Recently however, Ori et al<sup>112</sup> have reported remarkable results in 24 patients with CML transplanted with reduced intensity regimens (fludarabine, melphalan). The overall and disease-free survival at 5 years was 85%, with all evaluated patients being free of leukemia by RT-PCR.

In an attempt to confirm these remarkable results, the Chronic Leukaemia Working Party of the European Group for Blood and Marrow Transplantation (EBMT-CLWP) have recently conducted a retrospective study of the outcome of reduced intensity transplant procedures for CML.<sup>113</sup> They identified 223 patients with a median age of 49 years who had received RICT using a variety of conditioning regimens. Transplant-related mortality at 1 year was acceptable at 18% for patients in first chronic phase and 31% for more advanced phase disease. Acute graft-versus-host disease (GvHD) > Grade I occurred in 29% of patients, and 26% of evaluable patients experienced extensive chronic GvHD. Factors predictive of improved outcome included transplant in chronic phase and transplant within

1 year of diagnosis. It would appear that patients should be offered RICT based on the same criteria that are applied to conventional allo-SCT. This group of patients was highly heterogeneous with respect to their disease status, types of donor, prior therapy, and conditioning regimens. A clearer picture of the benefits of RICT and imatinib in the management of patients with CML will only emerge from well-conducted prospective studies.

### **Can Imatinib and Allo-SCT Be Combined to Optimize Management of Newly Diagnosed Patients?**

With the exception of a small proportion of patients on IFN- $\alpha$ , we have never previously had a chemotherapeutic agent capable of inducing cytogenetic remissions of reasonable duration. The use of imatinib prior to transplantation would permit transplant in "complete remission," and might therefore reduce the risk of disease recurrence. This approach could then be reasonably combined with a RICT to minimize transplant-related mortality. The risk of this strategy is a possible harmful effect of prior therapy with imatinib on the outcome of transplant, akin to that observed by some groups with IFN- $\alpha$ .<sup>114,115</sup>

Imatinib has already been widely and effectively used to restore remission in patients relapsing after allo-SCT.<sup>116</sup> An alternative to the above approach would be to perform RICT soon after diagnosis without prior imatinib. The kinase inhibitor would be introduced shortly after transplantation prophylactically or preemptively to control minimal residual disease, thereby delaying administration of donor lymphocytes to beyond 1 year of transplant, and thus reducing the risk of GvHD and cytopenias.<sup>117</sup>

### **How Should the Patient in Continuing Chronic Phase Be Managed?**

We have defined a response to imatinib as the achievement of a CCR within 12 months of the onset of therapy. Patients who fail to respond or who lose their response, even though they remain in chronic phase, should be offered an allogeneic transplant (conventional or RICT) as soon as possible if they are of a suitable age and performance status and have an available donor. However, allo-SCT will be unsuitable for some of these patients and other therapies should be investigated. Various possibilities include: (1) continuing imatinib at 400 mg/day; (2) increasing the dose of imatinib to 600 or 800 mg/day; (3) adding another agent such as IFN- $\alpha$ , Ara-C, hydroxyurea, decitabine, or homoharringtonine; (4) changing treatment to one or more of these agents; and (5) considering an autologous transplant.

We have recently completed a case matched study

of patients who received IFN- $\alpha$  during the Medical Research Council (MRC) CML III trial,<sup>118</sup> who were unable to receive imatinib as their disease predated its introduction, with patients who received IFN- $\alpha$  as standard therapy, failed treatment, and then received imatinib. Patients treated with imatinib after IFN- $\alpha$  failure who achieved at least a minor cytogenetic response had a much improved outcome compared to the historical group. However patients who received imatinib and failed to get a minor cytogenetic response had a considerably worse outcome than the controls (**Figure 6**). This might suggest that, for some patients, continuing imatinib in the absence of a minor cytogenetic response might actually be harmful.<sup>119</sup>

Kantarjian et al recently reported that 19 (56%) of the 34 patients classified as cytogenetically resistant on imatinib at 400 mg/day subsequently improved cytogenetically when imatinib was increased to 600 or 800 mg/day.<sup>120</sup> Our own experience has been less favorable. Of 36 consecutive patients with CML in chronic phase in complete hematologic response whose imatinib dosage was increased when they failed to achieve a CCR on 400 mg/day, 14 (39%) improved their cytogenetic responses and 7 (19%) achieved CCR. Unfortunately, many of these responses were short-last-

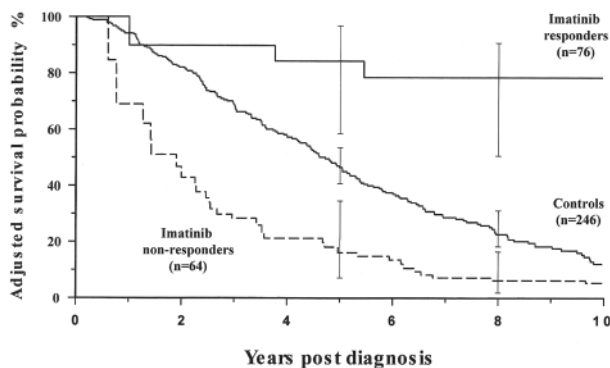

**Figure 6. Adjusted probabilities of survival according to cytogenetic response and treatment (from the left truncated Cox regression model).**

Patients on imatinib who achieved at least a minor cytogenetic response during the first 6 months of treatment obtained benefit when compared with patients receiving conventional treatment, whereas imatinib-treated patients who failed to respond had a poorer survival than controls. Adjusted probabilities of survival at 8 years from diagnosis were 78.4% (CI: 51.3-92.6) (RR: 0.13, CI: 0.046-0.39) for imatinib responders, 22.6% (CI: 17.8-29.4) for control patients and 6.2% (CI: 2.1-16.8) (RR: 1.69, CI: 1.086-2.64) for imatinib nonresponders (see text). Other variables found to be significant in the multivariate model were age  $\geq 60$  years (RR: 1.58, CI: 1.16-2.14), primary hematologic resistance to interferon- $\alpha$  (RR: 2.62, CI: 1.69-4.07), primary cytogenetic resistance to interferon- $\alpha$  (RR: 0.3, CI: 0.10-0.87) and Sokal high-risk group (RR: 2.0, CI: 1.22-3.28).

ing and at the latest follow-up 6 (43%) of the 14 had lost their best response. Similarly disappointing results have been reported by Zonder et al.<sup>121</sup>

Homoharringtonine (HHT) is a cephalotaxine alkaloid that has both in vitro and in vivo activity against CML. O'Brien et al<sup>122</sup> treated 71 patients in late chronic phase with HHT by continuous infusions over 7-14 days. Of these, 72% of the patients achieved complete hematologic remission with 15% developing MCR. Laboratory data suggested that the effects of HHT in combination with IFN- $\alpha$  or Ara-C would be synergistic<sup>123</sup> and this was subsequently confirmed in a further cohort of 37 patients in early chronic phase who received HHT and IFN- $\alpha$ . The rates of complete hematologic and cytogenetic responses were higher at 84% and 52%, respectively, compared to historical groups treated with either agent alone.<sup>124</sup> Further in vitro data using CML cell lines and primary material suggest that the combination of imatinib and HHT may also be additive.<sup>125,126</sup>

Autologous transplantation has been widely used in the management of CML but its exact role has never been clearly defined. There is a suggestion that autografting may prolong the chronic phase for some patients<sup>127</sup> and, in addition, that it may restore sensitivity to IFN- $\alpha$  in patients who have lost prior cytogenetic responses.<sup>128</sup> Autologous transplant may therefore have a role to play in both improving the degree of cytogenetic and molecular responses to imatinib and in restoring responses. Furthermore, patients who achieve CCR may be offered autologous transplantation with Ph-negative stem cells either to consolidate their remission or to prolong the chronic phase at the time of loss of response or progression to advanced phase. These patients should therefore be offered the opportunity to cryopreserve a population of Ph-negative stem cells at the time of CCR. However, the attempts at harvesting stem cells under these circumstances have met with mixed success. Some groups have attempted stem cell collection while the patients remained on imatinib. This appears to be successful in approximately 40-50% of patients in CCR<sup>129</sup> (and Drummond et al, submitted). In Drummond et al's study, shorter duration of the chronic phase prior to commencing imatinib was associated with successful collection. In contrast, Hui et al found no correlation between the duration of CML or of treatment with imatinib and the cell yield. This was, however, improved when imatinib was withheld for 3 days prior to the start of growth factor administration.<sup>128</sup> To date there have not been any reports of the use of cells mobilized from imatinib responders in autologous transplant procedures.

The management of patients who achieve CCR but who continue to have molecular evidence of disease is

highly controversial. In this context, managing a clear “failure” might be considerably easier than managing a partial success. These patients are not “cured” of their disease and are therefore at risk of disease progression. The simplest approach is to continue treatment with regular molecular monitoring by quantitative RT-PCR. If levels of residual disease show a sustained increase, the patients can be offered transplant if possible. Alternatively they, like patients with cytogenetic responses other than complete, might be suitable candidates for alternative strategies within carefully conducted Phase II/III studies. Such strategies include those listed above for imatinib nonresponders with the additional choices of conventional or reduced intensity allo-SCT where possible and adoptive immunotherapy.

Adoptive immunotherapy is designed to enhance the autologous or allogeneic immune response to the leukemia. CML is known to respond to immune-mediated therapies, in particular the use of donor lymphocyte infusions to treat relapse occurring after allo-SCT.<sup>130</sup> To date, a consistent target antigen for the immune response has not been identified. Several groups have confirmed the immunogenicity of peptides derived from the junctional region of the e14a2 fusion protein in that lysis of *BCR-ABL*-expressing leukemic cells by HLA-restricted cytotoxic T cells (CTL) can be achieved in vitro (reviewed by Schwartz et al<sup>131</sup>). However, lysis is relatively inefficient and this was attributed to poor expression of peptides on the cell surface. More recently, Clark et al<sup>132</sup> have shown the presence of both cell surface Bcr-Abl peptides presented by HLA A0301 and circulating peptide-restricted T cells. Attempts to use e14a2-derived peptides as vaccines have met with limited success.<sup>133</sup> Cathcart et al<sup>134</sup> treated 12 patients by vaccination with a combination of peptides over a 10-week period. Proliferative responses to autologous cells were demonstrated in 11 individuals. Three patients achieved an increase in the proportion of Ph-negative metaphases in their bone marrow and 2 patients treated for disease recurrence after allo-SCT, became RT-PCR negative for *BCR-ABL* transcripts.

Others have utilized alternative target antigens such as proteinase 3, Wilms tumor protein (WT1) and minor histocompatibility antigens. Proteinase 3, normally found in myeloid granules, is overexpressed in myeloid leukemias. HLA-restricted T cells specific for a nonpolymorphic peptide (PR1) were capable of inhibiting the growth of CML progenitors.<sup>135</sup> Furthermore, high avidity PR1-specific T cells are absent from the blood of newly diagnosed patients with CML but can be found in cytogenetic responders. These high avidity T cells underwent apoptosis when exposed to leukemic cells overexpressing proteinase 3 suggesting that

they are preferentially deleted during the course of the disease.<sup>136</sup> Phase I/II studies of the efficacy of PR1 peptide vaccination have now been initiated.

WT1 is also overexpressed in leukemic cells and is currently used as a marker of minimal residual disease. Several groups have generated WT1-derived peptide-specific T cells that can lyse autologous targets and preferentially inhibit the growth of CML progenitors (reviewed by Schwartz et al<sup>131</sup>). There is also evidence of a humoral response to WT1 with a high incidence of WT1-specific antibodies in patients with CML. Antibodies were found in 19% of affected patients compared to 2% of normal individuals.<sup>137</sup> It is highly likely that studies of both WT1 cytotoxic T cells and peptide vaccination will be tested clinically in the near future. HSP-peptide complexes contain a broad array of peptides tightly but noncovalently bound to the HSP molecules. It is the peptide component that is patient-specific and most importantly, immunogenic. Udono and Srivastava have shown that Hsp70 derived from tumor cells elicits tumor-specific immunity while Hsp70 derived from normal cells does not.<sup>138</sup> Preliminary results of a phase I study using Hsp70-peptide derived from autologous leukocytes of patients with CML suggest that the vaccine is safe and a phase II study of efficacy is currently under way.

In the context of allogeneic transplantation, differences in the expression of minor histocompatibility antigens (mH), might be suitable for exploitation for immunotherapy. Goulmy's group has identified HLA-restricted mH antigen-specific CTL in recipients of allogeneic transplantation.<sup>139</sup> In particular, a patient with CML in accelerated phase was successfully treated with leukemia-specific CTLs.<sup>140</sup> More recently, this group has been able to characterize a number of hematopoietic-specific mH (i.e., HA-1 and HA-2) and has subsequently generated HA-1 and HA-2 specific CTL.<sup>141</sup> They suggest that these CTL might be used clinically to eradicate leukemia without the complication of GvHD, which still presents an obstacle to the successful use of bulk populations of donor lymphocytes.

The future of CML management must lie in devising individual patient-specific strategies. At the present time, the long-term outcome of treatment with imatinib remains uncertain. Patients must be evaluated for adverse features at the time of diagnosis and repeatedly throughout the course of their disease. Those who are responding suboptimally to their current therapy should be offered alternative approaches in the context of well-designed and well-recorded clinical studies. The possibilities for management are numerous and exciting. However, our enthusiasm must be tempered with an objective approach to the problem that CML is a het-



erogeneous disease and, therefore, the various subpopulations of patients differ from each other in the nature of their response to individual therapeutic regimens.

## REFERENCES

- Rowley JD. Letter: A new consistent chromosomal abnormality in chronic myelogenous leukaemia identified by quinacrine fluorescence and Giemsa staining. *Nature*. 1973;243:290-293.
- McWhirter JR, Galasso DL, Wang JY. A coiled-coil oligomerization domain of Bcr is essential for the transforming function of Bcr-Abl oncoproteins. *Mol Cell Biol*. 1993;13:7587-7595.
- Deininger MW, Goldman JM, Melo JV. The molecular biology of chronic myeloid leukemia. *Blood*. 2000;96:3343-3356.
- Barnes DJ, Melo JV. Cytogenetic and molecular genetic aspects of chronic myeloid leukaemia. *Acta Haematol*. 2002;108:180-202.
- Buchdunger E, Cioffi CL, Law N, et al. Abl protein-tyrosine kinase inhibitor STI571 inhibits *In vitro* signal transduction mediated by c-Kit and platelet-derived growth factor receptors. *J Pharmacol Exp Ther*. 2000;295:139-145.
- Okuda K, Weisberg E, Gilliland DG, Griffin JD. ARG tyrosine kinase activity is inhibited by STI571. *Blood*. 2001;97:2440-2448.
- Druker BJ, Tamura S, Buchdunger E, et al. Effects of a selective inhibitor of the Abl tyrosine kinase on the growth of Bcr-Abl positive cells. *Nat Med*. 1996;2:561-566.
- Deininger MWN, Goldman JM, Lydon NB, Melo JV. The tyrosine kinase inhibitor CGP57148B selectively inhibits the growth of BCR-ABL positive cells. *Blood*. 1997;90:3691-3698.
- le Coutre P, Mologni L, Cleris L, et al. *In vivo* eradication of human BCR/ABL positive leukemia cells with an ABL kinase inhibitor. *J Natl Cancer Inst*. 1999;91:163-168.
- Mahon FX, Deininger MW, Schultheis B, et al. Selection and characterization of BCR-ABL positive cell lines with differential sensitivity to the tyrosine kinase inhibitor STI571: diverse mechanisms of resistance. *Blood*. 2000;96:1070-1079.
- Weisberg E, Griffin JD. Mechanism of resistance to the ABL tyrosine kinase inhibitor STI571 in BCR/ABL-transformed hematopoietic cell lines. *Blood*. 2000;95:3498-3505.
- Keeshan K, Mills KI, Cotter TG, McKenna SL. Elevated Bcr-Abl expression levels are sufficient for a haematopoietic cell line to acquire a drug-resistant phenotype. *Leukemia*. 2001;15:1823-1833.
- Gorre ME, Mohammed M, Ellwood K, et al. Clinical resistance to STI-571 cancer therapy caused by BCR-ABL gene mutation or amplification. *Science*. 2001;293:876-880.
- Shah NP, Nicoll JM, Nagar B, et al. Multiple BCR-ABL kinase domain mutations confer polyclonal resistance to the tyrosine kinase inhibitor imatinib (STI571) in chronic phase and blast crisis chronic myeloid leukemia. *Cancer Cell*. 2002;2:117-125.
- Branford S, Rudzki Z, Walsh S, et al. High frequency of point mutations clustered within the adenosine triphosphate-binding region of BCR/ABL in patients with chronic myeloid leukemia or Ph-positive acute lymphoblastic leukemia who develop imatinib (STI571) resistance. *Blood*. 2002;99:3472-3475.
- Hochhaus A, Kreil S, Corbin AS, et al. Molecular and chromosomal mechanisms of resistance to imatinib (STI571) therapy. *Leukemia*. 2002;16:2190-2196.
- Gambacorti-Passerini CB, Gunby RH, Piazza R, et al. Molecular mechanisms of resistance to imatinib in Philadelphia-chromosome-positive leukaemias. *Lancet Oncol*. 2003;4:75-85.
- Donato NJ, Wu JY, Stapley J, et al. BCR-ABL independence and LYN kinase overexpression in chronic myelogenous leukemia cells selected for resistance to STI571. *Blood*. 2003;101:690-698.
- Tipping AJ, Deininger MW, Goldman JM, Melo JV. Comparative gene expression profile of chronic myeloid leukemia cells innately resistant to imatinib mesylate. *Exp Hematol*. In press.
- Blagosklonny MV. STI-571 must select for drug-resistant cells but 'no cell breathes fire out of its nostrils like a dragon'. *Leukemia*. 2002;16:570-572.
- Luzzatto L, Frassoni F, Melo JV. Imatinib: can one outwit chronic myeloid leukemia? *Haematologica*. 2002;87:898-901.
- Nagar B, Bornmann WG, Pellicena P, et al. Crystal structures of the kinase domain of c-Abl in complex with the small molecule inhibitors PD173955 and imatinib (STI-571). *Cancer Res*. 2002;62:4236-4243.
- Dorsey JF, Jove R, Kraker AJ, Wu J. The pyrido[2,3-d]pyrimidine derivative PD180970 inhibits p210Bcr-Abl tyrosine kinase and induces apoptosis of K562 leukemic cells. *Cancer Res*. 2000;60:3127-3131.
- Wisniewski D, Lambek CL, Liu C, et al. Characterization of potent inhibitors of the Bcr-Abl and the c-kit receptor tyrosine kinases. *Cancer Res*. 2002;62:4244-4255.
- Huron DR, Gorre ME, Kraker AJ, et al. A Novel Pyridopyrimidine Inhibitor of Abl Kinase Is a Picomolar Inhibitor of Bcr-abl-driven K562 Cells and Is Effective against STI571-resistant Bcr-abl Mutants. *Clin Cancer Res*. 2003;9:1267-1273.
- Mow BM, Chandra J, Svingen PA, et al. Effects of the Bcr/abl kinase inhibitors STI571 and adaphostin (NSC 680410) on chronic myelogenous leukemia cells *in vitro*. *Blood*. 2002;99:664-671.
- Guo XY, Cuillerot JM, Wang T, et al. Peptide containing the BCR oligomerization domain (AA 1-160) reverses the transformed phenotype of p210bcr-abl positive 32D myeloid leukemia cells. *Oncogene*. 1998;17:825-833.
- He Y, Wertheim JA, Xu L, et al. The coiled-coil domain and Tyr177 of bcr are required to induce a murine chronic myelogenous leukemia-like disease by bcr/abl. *Blood*. 2002;99:2957-2968.
- Voncken JW, van Schaick H, Kaartinen V, et al. Increased neutrophil respiratory burst in bcr-null mutants. *Cell*. 1995;80:719-728.
- An WG, Schulte TW, Neckers LM. The heat shock protein 90 antagonist geldanamycin alters chaperone association with p210bcr-abl and v-src proteins before their degradation by the proteasome. *Cell Growth Differ*. 2000;11:355-360.
- Nimmanapalli R, O'Bryan E, Bhalla K. Geldanamycin and its analogue 17-allylamino-17-demethoxygeldanamycin lowers Bcr-Abl levels and induces apoptosis and differentiation of Bcr-Abl-positive human leukemic blasts. *Cancer Res*. 2001;61:1799-1804.
- Gorre ME, Ellwood-Yen K, Chiosis G, Rosen N, Sawyers CL. BCR-ABL point mutants isolated from patients with imatinib mesylate-resistant chronic myeloid leukemia remain sensitive to inhibitors of the BCR-ABL chaperone heat shock protein 90. *Blood*. 2002;100:3041-3044.
- La Rosee P, Johnson K, Corbin AS, et al. *In vitro* efficacy of combined treatment depends on the underlying mechanism of resistance in imatinib-resistant Bcr-Abl positive cell lines. *Blood*. In press.
- Clark RE. Antisense therapeutics in chronic myeloid leukaemia: the promise, the progress and the problems.

- Leukemia. 2000;14:347-355.
35. Braasch DA, Corey DR. Novel antisense and peptide nucleic acid strategies for controlling gene expression. *Biochemistry*. 2002;41:4503-4510.
  36. Wilda M, Fuchs U, Wossmann W, Borkhardt A. Killing of leukemic cells with a BCR/ABL fusion gene by RNA interference (RNAi). *Oncogene*. 2002;21:5716-5724.
  37. Scherr M, Battmer K, Winkler T, et al. Specific inhibition of bcr-abl gene expression by small interfering RNA. *Blood*. 2003;101:1566-1569.
  38. Wohlbold L, van der KH, Miething C, et al. Inhibition of bcr-abl gene expression by small interfering RNA sensitizes for imatinib mesylate (STI571). *Blood*. In press.
  39. James HA, Gibson I. The therapeutic potential of ribozymes. *Blood*. 1998;91:371-382.
  40. Tanabe T, Kuwabara T, Warashina M, et al. Oncogene inactivation in a mouse model. *Nature*. 2000;406:473-474.
  41. Cobaleda C, Sanchez-Garcia I. In vivo inhibition by a site-specific catalytic RNA subunit of RNase P designed against the BCR-ABL oncogenic products: a novel approach for cancer treatment. *Blood*. 2000;95:731-737.
  42. Wu Y, Yu L, McMahon R, et al. Inhibition of bcr-abl oncogene expression by novel deoxyribozymes (DNAzymes). *Hum Gene Ther*. 1999;10:2847-2857.
  43. Pendergast AM, Quilliam LA, Cripe LD, et al. BCR-ABL-induced oncogenesis is mediated by direct interaction with the SH2 domain of the GRB-2 adaptor protein. *Cell*. 1993;75:175-185.
  44. Puil L, Liu J, Gish G, et al. Bcr-Abl oncoproteins bind directly to activators of the Ras signalling pathway. *EMBO J*. 1994;13:764-773.
  45. Pelicci G, Lanfrancone L, Salcini AE, et al. Constitutive phosphorylation of Shc proteins in human tumors. *Oncogene*. 1995;11:899-907.
  46. Oda T, Heaney C, Hagopian JR, et al. Crkl is the major tyrosine-phosphorylated protein in neutrophils from patients with chronic myelogenous leukemia. *J Biol Chem*. 1994;269:22925-22928.
  47. Kardinal C, Konkol B, Schulz A, et al. Cell-penetrating SH3 domain blocker peptides inhibit proliferation of primary blast cells from CML patients. *FASEB J*. 2000;14:1529-1538.
  48. Kardinal C, Konkol B, Lin H, et al. Chronic myelogenous leukemia blast cell proliferation is inhibited by peptides that disrupt Grb2-SoS complexes. *Blood*. 2001;98:1773-1781.
  49. Peters DG, Hoover RR, Gerlach MJ, et al. Activity of the farnesyl protein transferase inhibitor SCH66336 against BCR/ABL-induced murine leukemia and primary cells from patients with chronic myeloid leukemia. *Blood*. 2001;97:1404-1412.
  50. Reichert A, Heisterkamp N, Daley GQ, Groffen J. Treatment of Bcr/Abl-positive acute lymphoblastic leukemia in P190 transgenic mice with the farnesyl transferase inhibitor SCH66336. *Blood*. 2001;97:1399-1403.
  51. Hoover RR, Mahon FX, Melo JV, Daley GQ. Overcoming STI571 resistance with the farnesyl transferase inhibitor SCH66336. *Blood*. 2002;100:1068-1071.
  52. Kuroda J, Kimura S, Segawa H, et al. The third-generation bisphosphonate Zoledronate synergistically augments the anti-Ph+ leukemia activity of imatinib mesylate. *Blood*. In press.
  53. Morgan MA, Dolp O, Reuter CW. Cell-cycle-dependent activation of mitogen-activated protein kinase kinase (MEK-1/2) in myeloid leukemia cell lines and induction of growth inhibition and apoptosis by inhibitors of RAS signaling. *Blood*. 2001;97:1823-1834.
  54. Yu C, Krystal G, Varticovski L, et al. Pharmacologic mitogen-activated protein/extracellular signal-regulated kinase kinase/mitogen-activated protein kinase inhibitors interact synergistically with STI571 to induce apoptosis in Bcr/Abl-expressing human leukemia cells. *Cancer Res*. 2002;62:188-199.
  55. Skorski T, Kanakaraj P, Nieborowska-Skorska M, et al. Phosphatidylinositol-3 kinase activity is regulated by BCR/ABL and is required for the growth of Philadelphia chromosome-positive cells. *Blood*. 1995;86:726-736.
  56. Klejman A, Rushen L, Morrione A, Slupianek A, Skorski T. Phosphatidylinositol-3 kinase inhibitors enhance the anti-leukemia effect of STI571. *Oncogene*. 2002;21:5868-5876.
  57. Huang S, Houghton PJ. Inhibitors of mammalian target of rapamycin as novel antitumor agents: from bench to clinic. *Curr Opin Investig Drugs*. 2002;3:295-304.
  58. Ly C, Arechiga AF, Melo JV, Walsh CM, Ong ST. Bcr-Abl kinase modulates the translation regulators ribosomal protein S6 and 4E-Bp1 in chronic myelogenous leukemia cells via mTOR. *Cancer Res*. In press.
  59. Sun X, Layton JE, Elefanty A, Lieschke GJ. Comparison of effects of the tyrosine kinase inhibitors AG957, AG490, and STI571 on BCR-ABL-expressing cells, demonstrating synergy between AG490 and STI571. *Blood*. 2001;97:2008-2015.
  60. Yu C, Krystal G, Dent P, Grant S. Flavopiridol potentiates STI571-induced mitochondrial damage and apoptosis in BCR-ABL-positive human leukemia cells. *Clin Cancer Res*. 2002;8:2976-2984.
  61. Goldman JM, Druker BJ. Chronic myeloid leukemia: current treatment options. *Blood*. 2001;98:2039-2042.
  62. Goldman JM. Chronic myeloid leukemia—past, present and future. *Seminars in Hematology*. 2003;40:1-3.
  63. Deininger MW, O'Brien SG, Ford JM, Druker BJ. Practical management of patients with chronic myeloid leukemia receiving imatinib. *J Clin Oncol*. 2003;21:1637-1647.
  64. Peggs K, Mackinnon S. Imatinib mesylate—the new gold standard for treatment of chronic myeloid leukemia. *N Engl J Med*. 2003;348:1048-1050.
  65. Druker BJ, Sawyers CL, Kantarjian H, et al. Activity of a specific inhibitor of the BCR-ABL tyrosine kinase in the blast crisis of chronic myeloid leukemia and acute lymphoblastic leukemia with the Philadelphia chromosome. *N Engl J Med*. 2001;344:1038-1042.
  66. Kantarjian H, Sawyers C, Hochhaus A, et al. Hematologic and cytogenetic responses to imatinib mesylate in chronic myelogenous leukemia. *N Engl J Med*. 2002;346:645-652.
  67. Talpaz M, Silver RT, Druker BJ, et al. Imatinib induces durable hematologic and cytogenetic responses in patients with accelerated phase chronic myeloid leukemia: results of a phase 2 study. *Blood*. 2002;99:1928-1937.
  68. Sawyers CL, Hochhaus A, Feldman E, et al. Imatinib induces hematologic and cytogenetic responses in patients with chronic myelogenous leukemia in myeloid blast crisis: results of a phase II study. *Blood*. 2002;99:3530-3539.
  69. O'Brien SG, Guilhot F, Larson RA, et al. Imatinib compared with interferon and low-dose cytarabine for newly diagnosed chronic-phase chronic myeloid leukemia. *N Engl J Med*. 2003;348:994-1004.
  70. Bonifazi F, de Vivo A, Rosti G, et al. Chronic myeloid leukemia and interferon-alpha: a study of complete cytogenetic responders. *Blood*. 2001;98:3074-3081.
  71. Mahon FX, Delbrel X, Cony-Makhoul P, et al. Follow-up of complete cytogenetic remission in patients with chronic myeloid leukemia after cessation of interferon alfa. *J Clin Oncol*. 2002;20:214-220.
  72. von Bubnoff N, Schneller F, Peschel C, Duyster J. BCR-ABL gene mutations in relation to clinical resistance of Philadel-

- phia-chromosome-positive leukaemia to STI571: a prospective study. *Lancet*. 2002;359:487-491.
73. Roche-Lestienne C, Soenen-Cornu V, Grardel-Duflos N, et al. Several types of mutations of the Abl gene can be found in chronic myeloid leukemia patients resistant to STI571, and they can pre-exist to the onset of treatment. *Blood*. 2002;100:1014-1018.
  74. Roumiantsev S, Shah NP, Gorre ME, et al. Clinical resistance to the kinase inhibitor STI-571 in chronic myeloid leukemia by mutation of Tyr-253 in the Abl kinase domain P-loop. *Proc Natl Acad Sci U S A*. 2002;99:10700-10705.
  75. Branford S, Rudzki Z, Walsh S, et al. Detection of BCR-ABL mutations in patients with CML treated with imatinib is virtually always accompanied by clinical resistance, and mutations in the ATP phosphate-binding loop (P-loop) are associated with a poor prognosis. *Blood*. 2003;102:276-283.
  76. Lion T, Gaiger A, Henn T, et al. Use of quantitative polymerase chain reaction to monitor residual disease in chronic myelogenous leukemia during treatment with interferon. *Leukemia*. 1995;9:1353-1360.
  77. Kurzrock R, Estrov Z, Kantarjian H, Talpaz M. Conversion of interferon-induced, long-term cytogenetic remissions in chronic myelogenous leukemia to polymerase chain reaction negativity. *J Clin Oncol*. 1998;16:1526-1531.
  78. Mensink E, van de LA, Schattenberg A, et al. Quantitation of minimal residual disease in Philadelphia chromosome positive chronic myeloid leukaemia patients using real-time quantitative RT-PCR. *Br J Haematol*. 1998;102:768-774.
  79. Preudhomme C, Revillion F, Merlat A, et al. Detection of BCR-ABL transcripts in chronic myeloid leukemia (CML) using a 'real time' quantitative RT-PCR assay. *Leukemia*. 1999;13:957-964.
  80. Branford S, Hughes TP, Rudzki Z. Monitoring chronic myeloid leukaemia therapy by real-time quantitative PCR in blood is a reliable alternative to bone marrow cytogenetics. *Br J Haematol*. 1999;107:587-599.
  81. Hochhaus A, Reiter A, Saussele S, et al. Molecular heterogeneity in complete cytogenetic responders after interferon-alpha therapy for chronic myelogenous leukemia: low levels of minimal residual disease are associated with continuing remission. German CML Study Group and the UK MRC CML Study Group. *Blood*. 2000;95:62-66.
  82. Radich JP, Gooley T, Bryant E, et al. The significance of bcr-abl molecular detection in chronic myeloid leukemia patients "late," 18 months or more after transplantation. *Blood*. 2001;98:1701-1707.
  83. Lin F, van Rhee F, Goldman JM, Cross NC. Kinetics of increasing BCR-ABL transcript numbers in chronic myeloid leukemia patients who relapse after bone marrow transplantation. *Blood*. 1996;87:4473-4478.
  84. Olavarria E, Kanfer E, Szydlo R, et al. Early detection of BCR-ABL transcripts by quantitative reverse transcriptase-polymerase chain reaction predicts outcome after allogeneic stem cell transplantation for chronic myeloid leukemia. *Blood*. 2001;97:1560-1565.
  85. Merx K, Muller MC, Kreil S, et al. Early reduction of BCR-ABL mRNA transcript levels predicts cytogenetic response in chronic phase CML patients treated with imatinib after failure of interferon alpha. *Leukemia*. 2002;16:1579-1583.
  86. Wang L, Pearson K, Pillitteri L, Ferguson JE, Clark RE. Serial monitoring of BCR-ABL by peripheral blood real-time polymerase chain reaction predicts the marrow cytogenetic response to imatinib mesylate in chronic myeloid leukaemia. *Br J Haematol*. 2002;118:771-777.
  87. Kantarjian HM, Talpaz M, Cortes J, et al. Quantitative Polymerase Chain Reaction Monitoring of BCR-ABL during Therapy with Imatinib Mesylate (STI571; Gleevec) in Chronic-Phase Chronic Myelogenous Leukemia. *Clin Cancer Res*. 2003;9:160-166.
  88. Hughes T, Branford S. Molecular monitoring of chronic myeloid leukemia. *Semin Hematol*. 2003;40:62-68.
  89. Markt S, Marin D, Foot N, et al. Chronic myeloid leukemia in chronic phase responding to imatinib: the occurrence of additional cytogenetic abnormalities predicts disease progression. *Haematologica*. 2003;88:260-267.
  90. Andersen MK, Pedersen-Bjergaard J, Kjeldsen L, Dufva IH, Brondum-Nielsen K. Clonal Ph-negative hematopoiesis in CML after therapy with imatinib mesylate is frequently characterized by trisomy 8. *Leukemia*. 2002;16:1390-1393.
  91. O'Dwyer ME, Gatter KM, Loriaux M, et al. Demonstration of Philadelphia chromosome negative abnormal clones in patients with chronic myelogenous leukemia during major cytogenetic responses induced by imatinib mesylate. *Leukemia*. 2003;17:481-487.
  92. Bumm T, Mueller C, Al Ali HK, et al. Emergence of clonal cytogenetic abnormalities in PH-negative cells in some CML patients in cytogenetic remission to imatinib but restoration of polyclonal hematopoiesis in the majority. *Blood*. 2003;101:1941-1949.
  93. Lin F, Drummond MW, O'Brien SG, et al. Molecular monitoring in CML patients who achieve complete cytogenetic remission on imatinib. *Blood*. 2003;102:143.
  94. Cortes J, Giles F, O'Brien S, et al. Result of high-dose imatinib mesylate in patients with Philadelphia chromosome-positive chronic myeloid leukemia after failure of interferon- $\alpha$ . *Blood*. 2003;102:83-86.
  95. Hughes TP, Kaeda J, Branford S, et al. Molecular responses to imatinib (STI571) or interferon + Ara-C as initial therapy for CML: results of the IRIS study [abstract]. *Blood*. 2002;100:93a.
  96. le Coutre P, Tassi E, Varella-Garcia M, et al. Induction of resistance to the Abelson inhibitor STI571 in human leukemic cells through gene amplification. *Blood*. 2000;95:1758-1766.
  97. Barthe C, Cony-Makhoul P, Melo JV, Reiffers J, Mahon FX. Roots of clinical resistance to STI-571 cancer therapy. *Science*. 2001;293:2163.
  98. Hofmann WK, Jones LC, Lemp NA, et al. Ph(+) acute lymphoblastic leukemia resistant to the tyrosine kinase inhibitor STI571 has a unique BCR-ABL gene mutation. *Blood*. 2002;99:1860-1862.
  99. Azam M, Latek RR, Daley GQ. Mechanisms of autoinhibition and STI-571/imatinib resistance revealed by mutagenesis of BCR-ABL. *Cell*. 2003;112:831-843.
  100. Corbin AS, Rosee PL, Stoffregen EP, Druker BJ, Deininger MW. Several Bcr-Abl kinase domain mutants associated with imatinib mesylate resistance remain sensitive to imatinib. *Blood*. 2003;101:4611-4614.
  101. Cross NC, Feng L, Chase A, et al. Competitive polymerase chain reaction to estimate the number of BCR-ABL transcripts in chronic myeloid leukemia patients after bone marrow transplantation. *Blood*. 1993;82:1929-1936.
  102. Mughal TI, Yong A, Szydlo RM, et al. Molecular studies in patients with chronic myeloid leukaemia in remission 5 years after allogeneic stem cell transplant define the risk of subsequent relapse. *Br J Haematol*. 2001;115:569-574.
  103. Goldman JM, Marin D, Olavarria E, Apperley JF. Clinical decisions for chronic myeloid leukemia in the imatinib era. *Semin Hematol*. 2003;40:98-103.
  104. Hansen JA, Gooley TA, Martin PJ, et al. Bone marrow transplants from unrelated donors for patients with chronic

- myeloid leukemia [see comments]. *N Engl J Med*. 1998;338:962-968.
105. Gratwohl A, Hermans J, Goldman JM, et al. Risk assessment for patients with chronic myeloid leukaemia before allogeneic blood or marrow transplantation. Chronic Leukemia Working Party of the European Group for Blood and Marrow Transplantation. *Lancet*. 1998;352:1087-1092.
  106. Marin D, Marktel S, Bua M, et al. Prognostic factors for patients with chronic myeloid leukemia in chronic phase treated with imatinib mesylate after failure of interferon alpha. *Leukemia*. In press.
  107. Craddock C, Szydlo RM, Dazzi F, et al. Cytomegalovirus seropositivity adversely influences outcome after T-depleted unrelated donor transplant in patients with chronic myeloid leukaemia: the case for tailored graft-versus-host disease prophylaxis. *Br J Haematol*. 2001;112:228-236.
  108. Sokal JE, Cox EB, Baccarani M, et al. Prognostic discrimination in "good-risk" chronic granulocytic leukemia. *Blood*. 1984;63:789-799.
  109. Hasford J, Pfirrmann M, Hehlmann R, et al. A new prognostic score for survival of patients with chronic myeloid leukemia treated with interferon alfa. Writing Committee for the Collaborative CML Prognostic Factors Project Group. *J Natl Cancer Inst*. 1998;90:850-858.
  110. Huntly BJ, Reid AG, Bench AJ, et al. Deletions of the derivative chromosome 9 occur at the time of the Philadelphia translocation and provide a powerful and independent prognostic indicator in chronic myeloid leukemia. *Blood*. 2001;98:1732-1738.
  111. Huntly BJ, Guilhot F, Reid AG, et al. Imatinib improves but may not fully reverse the poor prognosis of CML patients with derivative chromosome 9 deletions. *Blood*. In press.
  112. Ori R, Shapira MY, Resnick I, et al. Nonmyeloablative allogeneic stem cell transplantation for the treatment of chronic myeloid leukemia in first chronic phase. *Blood*. 2003;101:441-445.
  113. Crawley C, Lalancette M, Szydlo R, et al. Reduced intensity conditioned allografts for chronic myeloid leukemia: a study from the Chronic Leukemia Working Party of the EBMT [abstract]. *Blood*. 2002;100:3089A.
  114. Beelen DW, Graeven U, Elmaagacli AH, et al. Prolonged administration of interferon-alpha in patients with chronic-phase Philadelphia chromosome-positive chronic myelogenous leukemia before allogeneic bone marrow transplantation may adversely affect transplant outcome. *Blood*. 1995;85:2981-2990.
  115. Morton AJ, Gooley T, Hansen JA, et al. Association between pretransplant interferon-alpha and outcome after unrelated donor marrow transplantation for chronic myelogenous leukemia in chronic phase. *Blood*. 1998;92:394-401.
  116. Olavarria E, Craddock C, Dazzi F, et al. Imatinib mesylate (STI571) in the treatment of relapse of chronic myeloid leukemia after allogeneic stem cell transplantation. *Blood*. 2002;99:3861-3862.
  117. Marks DI, Lush R, Cavenagh J, et al. The toxicity and efficacy of donor lymphocyte infusions given after reduced-intensity conditioning allogeneic stem cell transplantation. *Blood*. 2002;100:3108-3114.
  118. Allan NC, Richards SM, Shepherd PC. UK Medical Research Council randomised, multicentre trial of interferon-alpha n1 for chronic myeloid leukaemia: improved survival irrespective of cytogenetic response. The UK Medical Research Council's Working Parties for Therapeutic Trials in Adult Leukaemia. *Lancet*. 1995;345:1392-1397.
  119. Marin D, Marktel S, Szydlo R, et al. Survival of patients with chronic myeloid leukaemia on imatinib after non-response to interferon-alpha. *Lancet*. In press.
  120. Kantarjian HM, Talpaz M, O'Brien S, et al. Dose escalation of imatinib mesylate can overcome resistance to standard-dose therapy in patients with chronic myelogenous leukemia. *Blood*. 2003;101:473-475.
  121. Zonder JA, Pemberton P, Brandt H, Mohamed AN, Schiffer CA. The effect of dose increase of imatinib mesylate in patients with chronic or accelerated phase chronic myelogenous leukemia with inadequate hematologic or cytogenetic response to initial treatment. *Clin Cancer Res*. 2003;9:2092-2097.
  122. O'Brien S, Kantarjian H, Keating M, et al. Homoharringtonine therapy induces responses in patients with chronic myelogenous leukemia in late chronic phase. *Blood*. 1995;86:3322-3326.
  123. Visani G, Russo D, Ottaviani E, et al. Effects of homoharringtonine alone and in combination with alpha interferon and cytosine arabinoside on 'in vitro' growth and induction of apoptosis in chronic myeloid leukemia and normal hematopoietic progenitors. *Leukemia*. 1997;11:624-628.
  124. O'Brien S, Talpaz M, Cortes J, et al. Simultaneous homoharringtonine and interferon-alpha in the treatment of patients with chronic-phase chronic myelogenous leukemia. *Cancer*. 2002;94:2024-2032.
  125. Scappini B, Onida F, Kantarjian HM, et al. In vitro effects of STI 571-containing drug combinations on the growth of Philadelphia-positive chronic myelogenous leukemia cells. *Cancer*. 2002;94:2653-2662.
  126. Tipping AJ, Mahon FX, Zafirides G, et al. Drug responses of imatinib mesylate-resistant cells: synergism of imatinib with other chemotherapeutic drugs. *Leukemia*. 2002;16:2349-2357.
  127. McGlave PB, De Fabritiis P, Deisseroth A, et al. Autologous transplants for chronic myelogenous leukaemia: results from eight transplant groups. *Lancet*. 1994;343:1486-1488.
  128. Olavarria E, Reiffers J, Boque C, et al. The post-transplant cytogenetic response to interferon is a major determinant of survival after autologous stem cell transplantation for chronic myeloid leukaemia in chronic phase. *Br J Haematol*. 2002;118:762-770.
  129. Hui CH, Goh KY, White D, et al. Successful peripheral blood stem cell mobilisation with filgrastim in patients with chronic myeloid leukaemia achieving complete cytogenetic response with imatinib, without increasing disease burden as measured by quantitative real-time PCR. *Leukemia*. 2003;17:821-828.
  130. Kolb HJ, Mittermuller J, Clemm C, et al. Donor leukocyte transfusions for treatment of recurrent chronic myelogenous leukemia in marrow transplant patients. *Blood*. 1990;76:2462-2465.
  131. Schwartz J, Pinilla-Ibarz J, Yuan RR, Scheinberg DA. Novel targeted and immunotherapeutic strategies in chronic myeloid leukemia. *Semin Hematol*. 2003;40:87-96.
  132. Clark RE, Dodi IA, Hill SC, et al. Direct evidence that leukemic cells present HLA-associated immunogenic peptides derived from the BCR-ABL b3a2 fusion protein. *Blood*. 2001;98:2887-2893.
  133. Pinilla-Ibarz J, Cathcart K, Korontsvit T, et al. Vaccination of patients with chronic myelogenous leukemia with bcr-abl oncogene breakpoint fusion peptides generates specific immune responses. *Blood*. 2000;95:1781-1787.
  134. Cathcart K, Pinilla-Ibarz J, Korontsvit T, et al. CML patients vaccinated with a multivalent Bcr-Abl peptide vaccine show specific immune responses in a phase II trial [abstract]. *Blood*. 2002;98:728a.

135. Molldrem JJ, Clave E, Jiang YZ, et al. Cytotoxic T lymphocytes specific for a nonpolymorphic proteinase 3 peptide preferentially inhibit chronic myeloid leukemia colony-forming units. *Blood*. 1997;90:2529-2534.
136. Molldrem JJ, Lee PP, Kant S, et al. Chronic myelogenous leukemia shapes host immunity by selective deletion of high-avidity leukemia-specific T cells. *J Clin Invest*. 2003;111:639-647.
137. Gaiger A, Carter L, Greinix H, et al. WT1-specific serum antibodies in patients with leukemia. *Clinical Cancer Research*. 2001;7:761s-765s.
138. Udono H, Srivastava PK. Heat shock protein 70-associated peptides elicit specific cancer immunity. *J Exp Med*. 1993;178:1391-1396.
139. den Haan JM, Sherman NE, Blokland E, et al. Identification of a graft versus host disease-associated human minor histocompatibility antigen. *Science*. 1995;268:1476-1480.
140. Falkenburg JH, Wafelman AR, Joosten P, et al. Complete remission of accelerated phase chronic myeloid leukemia by treatment with leukemia-reactive cytotoxic T lymphocytes. *Blood*. 1999;94:1201-1208.
141. Mutis T, Verdijk R, Schrama E, et al. Feasibility of immunotherapy of relapsed leukemia with ex vivo-generated cytotoxic T lymphocytes specific for hematopoietic system-restricted minor histocompatibility antigens. *Blood*. 1999;93:2336-2341.
